# Supplementary material
Source: PubMed Central journal article supplement (PMC5646699)
Supplement: NIHMS878281-supplement-1.pdf [file NIHMS878281-supplement-1.pdf]

# **Microscale arrays for the profiling of start and stop signals coordinating human-neutrophil swarming**

**Eduardo Reátegui,<sup>1,2,3</sup> Fatemeh Jalali,<sup>1</sup> Aimal H. Khankhel,<sup>1,2</sup> Elisabeth Wong,<sup>1</sup>  
Hansang Cho,<sup>1,3</sup> Jarone Lee,<sup>3,4</sup> Charles N. Serhan,<sup>3,5</sup> Jesmond Dalli,<sup>3,5</sup> Hunter  
Elliott,<sup>3,6</sup> Daniel Irimia<sup>1,3,7</sup>**

*<sup>1</sup>BioMEMS Resource Center, Department of Surgery, Massachusetts General Hospital / <sup>2</sup>Massachusetts  
General Hospital Cancer Center / <sup>3</sup>Harvard Medical School / <sup>4</sup>Department of Surgery, Massachusetts  
General Hospital / <sup>5</sup>Center for Experimental Therapeutics, Department of Anesthesiology, Perioperative,  
and Pain Medicine, Brigham and Women's Hospital / <sup>6</sup>Image and Data Analysis Core (IDAC) / <sup>7</sup>Shriners  
Burns Hospital*

## Table of Contents

|                                                                                                                                                      |    |
|------------------------------------------------------------------------------------------------------------------------------------------------------|----|
| <b>Microscale arrays for the profiling of start and stop signals coordinating human-neutrophil swarming</b> .....                                    | 1  |
| Supplementary Figures .....                                                                                                                          | 3  |
| Supplementary Figure 1. Schematic of zymosan particle patterning.....                                                                                | 3  |
| Supplementary Figure 2. Non-swarming neutrophil arrays.....                                                                                          | 4  |
| Supplementary Figure 3. The three phases of neutrophil swarming. ....                                                                                | 5  |
| Supplementary Figure 4. Neutrophil migration between adjacent swarms.....                                                                            | 6  |
| .....                                                                                                                                                | 7  |
| Supplementary Figure 5. Comparison of neutrophil dynamics during swarming.....                                                                       | 7  |
| Supplementary Figure 6. Single neutrophil dynamics quantification for biophysical modeling. ....                                                     | 9  |
| Supplementary Figure 7. Representative multiple reaction monitoring (MRM) chromatographs for lipids in the supernatant above neutrophil swarms. .... | 11 |
| Supplementary Figure 8. Quantification of cytokine secretion dynamics of neutrophils during swarming. ....                                           | 12 |
| Supplementary Figure 9. Comparison of neutrophil migration profiles from a healthy individual and trauma patients. ....                              | 13 |
| Supplementary Figure 10. Stained neutrophils after isolation. ....                                                                                   | 15 |
| Supplementary Tables.....                                                                                                                            | 16 |
| Supplementary Table 1. ....                                                                                                                          | 16 |
| Supplementary Table 2. ....                                                                                                                          | 17 |
| Supplementary Table 3. ....                                                                                                                          | 19 |
| Supplementary Table 4. ....                                                                                                                          | 31 |
| Supplementary Table 5. ....                                                                                                                          | 34 |
| Supplementary Video Captions. ....                                                                                                                   | 35 |

## Supplementary Figures

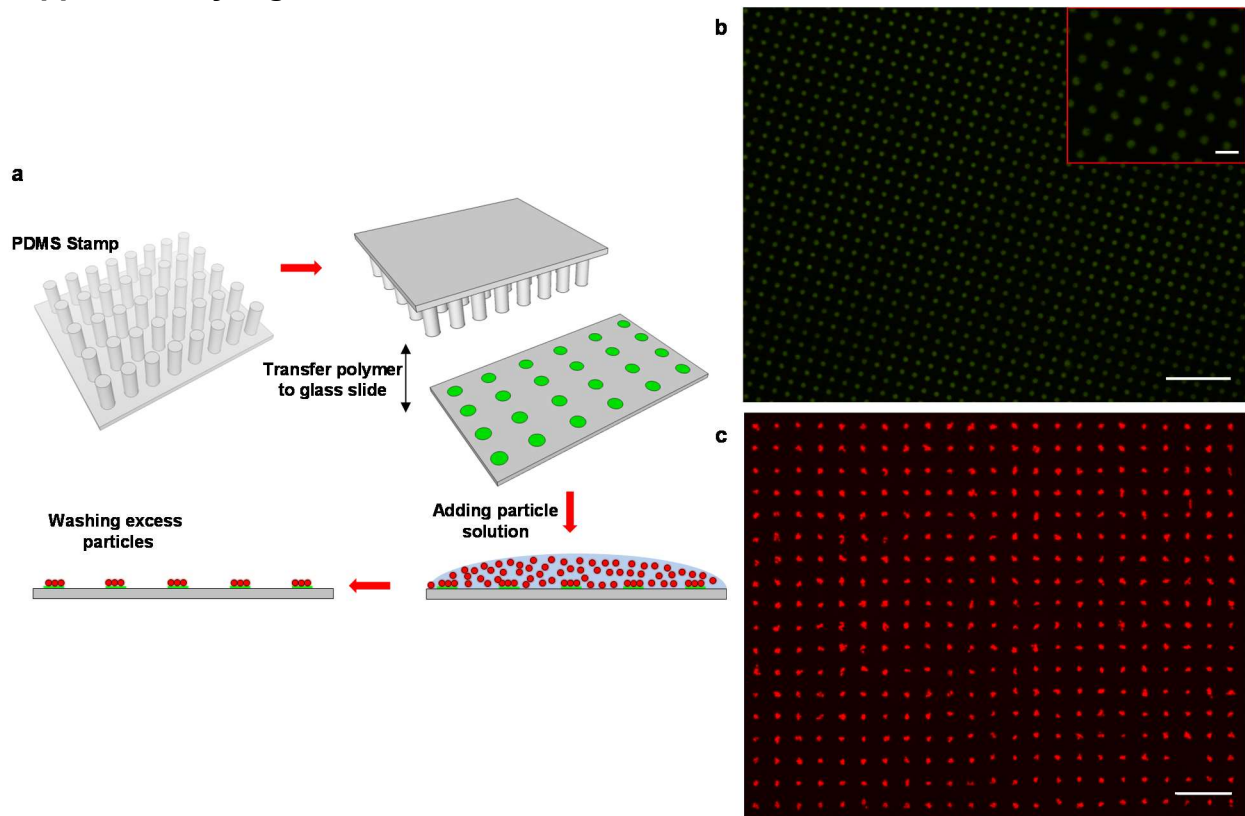

**Supplementary Figure 1. Schematic of zymosan particle patterning.** (a) Patterns were fabricated with 15 μm height PDMS pillars. The stamps were immersed in a ZETAG solution. After incubation, the pattern was transferred to a glass slide by applying pressure on the PDMS stamp. After drying, a filtered zymosan particle solution was added directly on top of the patterned glass slide and incubated for 10 min. The excess of particles was washed off thoroughly with water. (b) Fluorescence microscopy image of the ZETAG patterns on a glass slide. For imaging, fluorescein was added to the ZETAG solution used for stamping (scale bar 100 μm; insert, 20 μm). (c) Fluorescence microscopy image of an array of immobilized zymosan particles (red) on top of the ZETAG patterned layer (scale bar 100 μm).

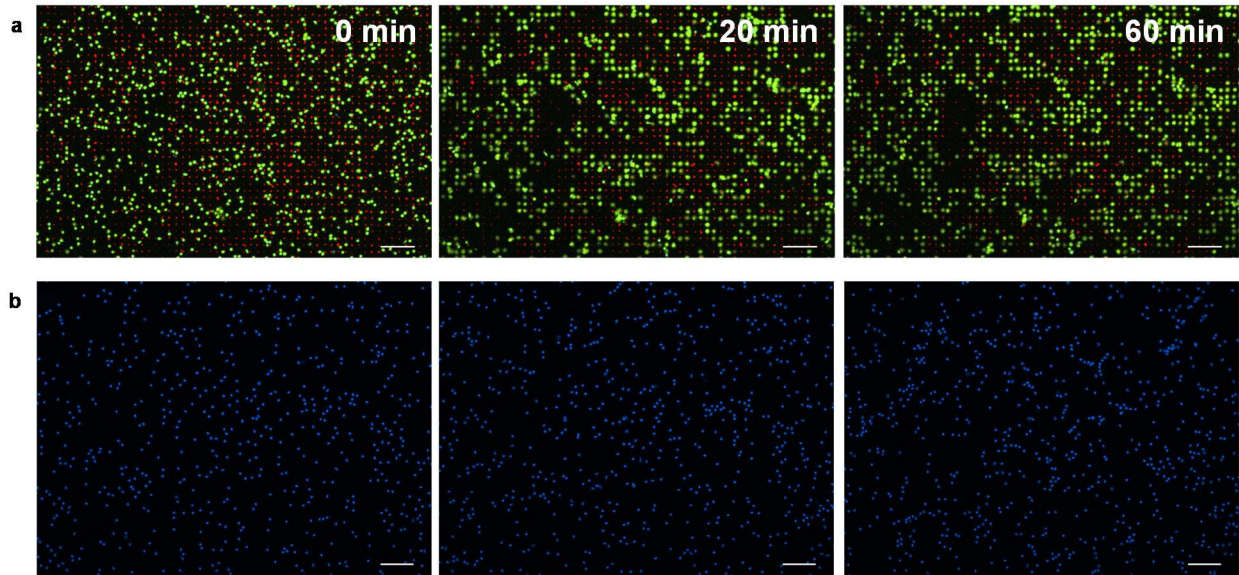

**Supplementary Figure 2. Non-swarming neutrophil arrays.** (a) When zymosan particles (red) are in small clusters (2-3 particles) or separated by 20  $\mu\text{m}$  or less, no swarms form on top of the particles (non-swarming control). Neutrophils co-localize with the particle clusters, one neutrophil per cluster, and no additional neutrophils are attracted. Time-lapse fluorescence images of neutrophils colocalizing on particle arrays. Green fluorescence neutrophils patterned as single cells (scale bar 100  $\mu\text{m}$ ). (b) In the non-activated control, neutrophils retain a spherical shape and move randomly on a glass substrate (scale bar 100  $\mu\text{m}$ ).

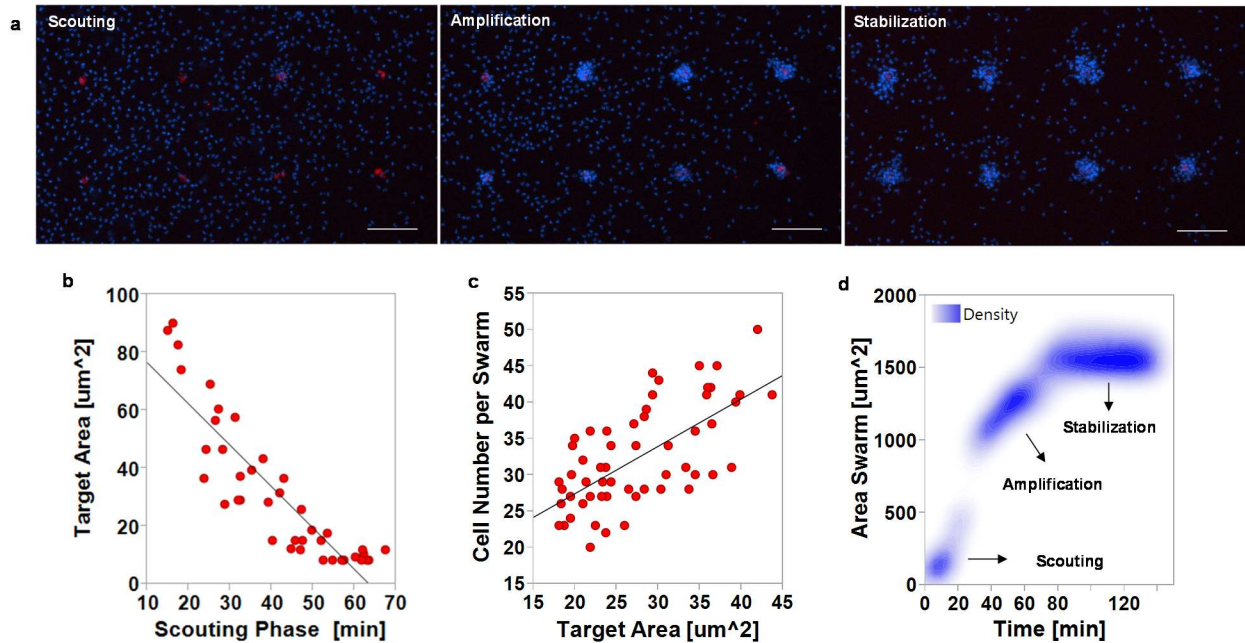

**Supplementary Figure 3. The three phases of neutrophil swarming.** (a) An array of neutrophil swarms generated on the platform at 5, 15 and 30 minutes, during the phases of scouting, amplification, and stabilization, respectively (scale bar 100  $\mu\text{m}$ ). During the scouting phase, neutrophils (blue) find the particle clusters (red). During the amplification phase, surrounding neutrophils migrate towards the swarm. During the stabilization phase, equal numbers of neutrophils join and leave the swarm and the size of the swarms remains constant. (b) Inverse relationship between the scouting phase of neutrophil swarming and size of the particle cluster (cluster area -  $R^2= 0.7916$ ). (c) The number of cells recruited on particle clusters of various size increases with cluster area ( $R^2= 0.4347$ ). (d) Average swarm size and swarming stages for 100 swarms on the platform.

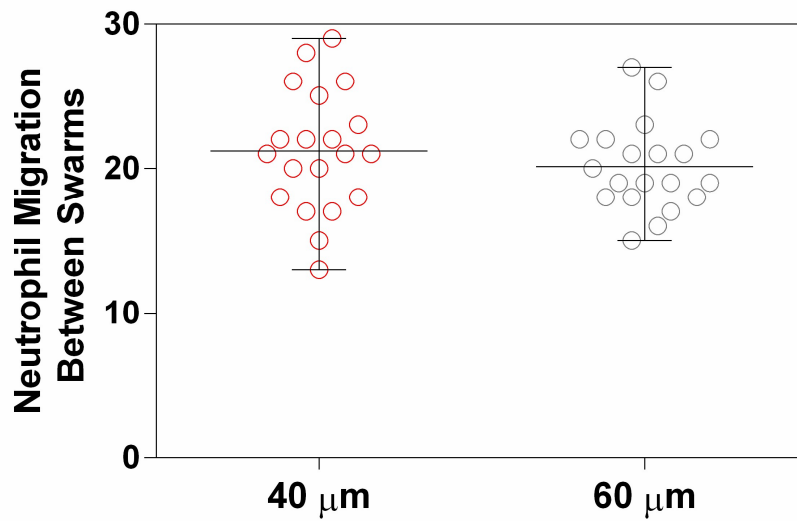

**Supplementary Figure 4. Neutrophil migration between adjacent swarms.** The number of neutrophils migrating between swarms formed around unequal zymosan-clusters pairs (areas A1 [50-60  $\mu\text{m}^2$ ] and A2 [35-45  $\mu\text{m}^2$  ]) is represented for clusters spaced at 40 and 60  $\mu\text{m}$ . Each data point represents the number of neutrophils migrating in separate experiments, between unequal, adjacent zymosan-cluster pairs.

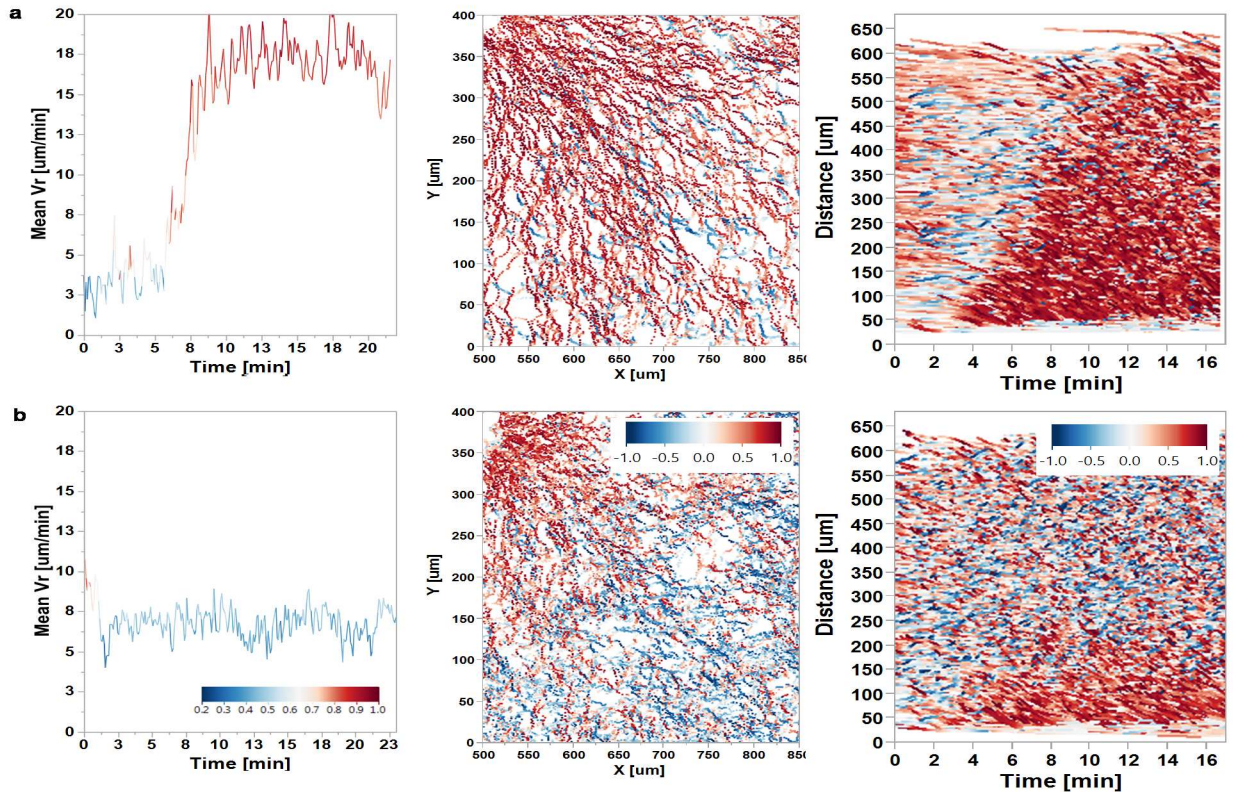

**Supplementary Figure 5. Comparison of neutrophil dynamics during swarming.**

(a) Mean radial velocity ( $V_r$ ) is plotted over time. The increase in  $V_r$  corresponds to higher CI towards the swarm. Transition in the velocity occurred around 10 min with neutrophils becoming highly chemotactic. Center panel, tracks of individual neutrophils during swarming. Only one-quarter of the field of view is shown. The particle cluster is located on the left corner. Right panel, the distances that neutrophils travel towards a swarm are plotted. Chemotactic migration can be distinguished with the high CI maintained over 450  $\mu\text{m}$  of migration. (b) Mean  $V_r$  shows that neutrophils near the particle clusters are very chemotactic during the first 2 to 3 min. Although, then  $V_r$  remained almost unaltered. Center panel, tracks of individual neutrophils during swarming, in which neutrophils have been inhibited for LTB4 through blocking of BLT1 and BLT2 receptors. Right panel, the distances that inhibited neutrophils travel towards

a swarm are plotted. Chemotactic migration can be distinguished with the CI over 150  $\mu\text{m}$ .



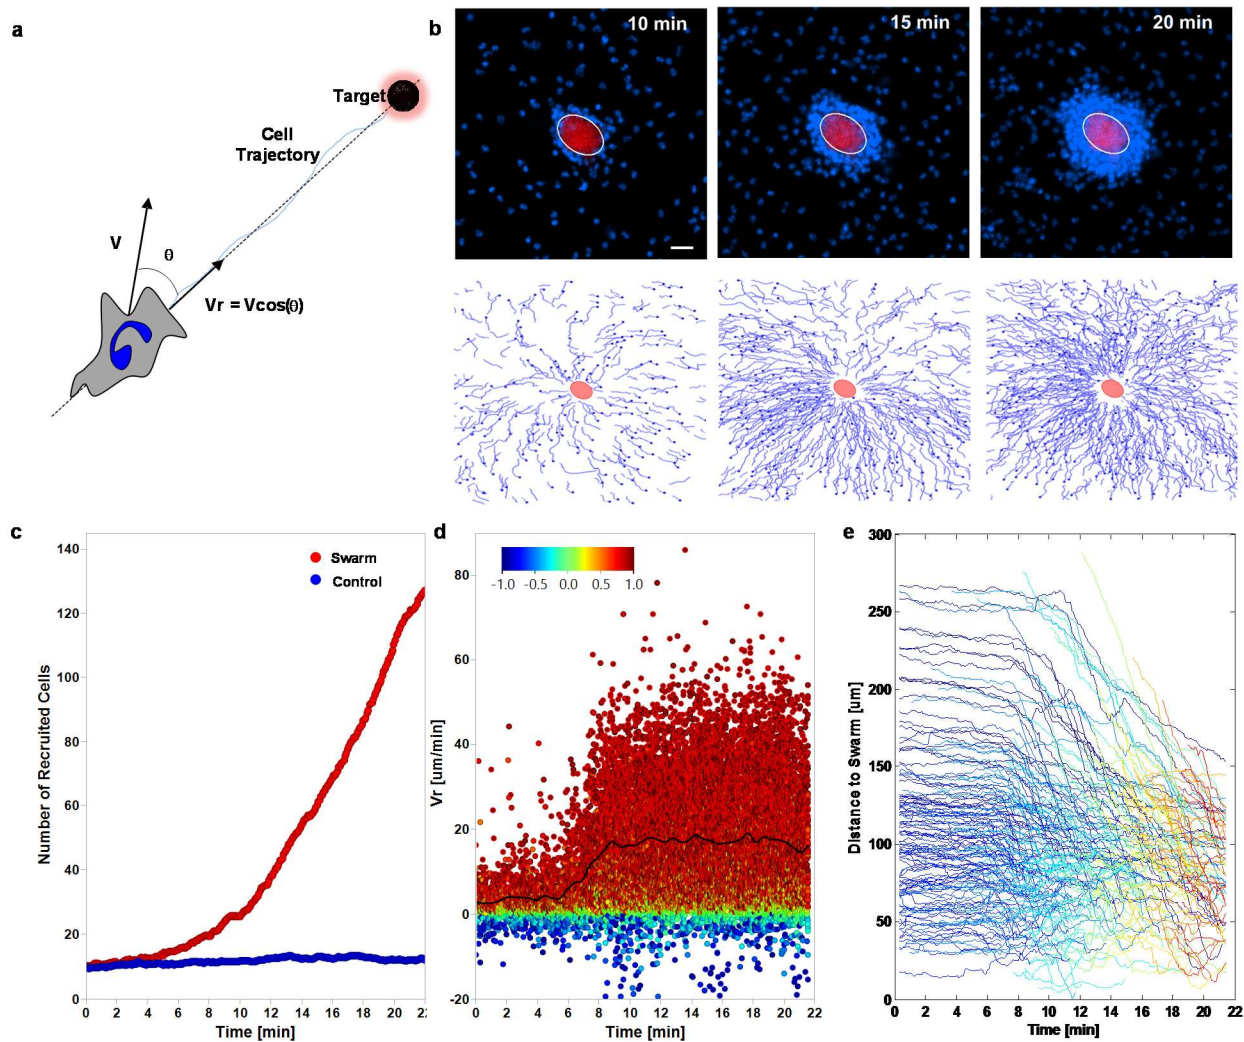

**Supplementary Figure 6. Single neutrophil dynamics quantification for biophysical modeling. (a)** Schematic representation of a neutrophil during chemotactic migration. **(b)** Fluorescence microscopy images of neutrophils recruited during swarming. The bottom panel shows the accumulation of the cells by increasing the number of tracks (blue lines) over time (scale bar 20  $\mu\text{m}$ ). **(c)** Number of recruited neutrophils during scouting and amplification phase. Non-activated controls represent non-stimulated neutrophils migrating randomly. **(d)** Instantaneous radial velocity of neutrophils during swarming. Color code represents the instantaneous CI of each cell. (-1) neutrophils are moving away from the target, (1) neutrophils are moving towards the

target. **(e)** Characterization of the distance traveled by neutrophils during chemotactic migration towards a swarm. Color code represents the time scale.

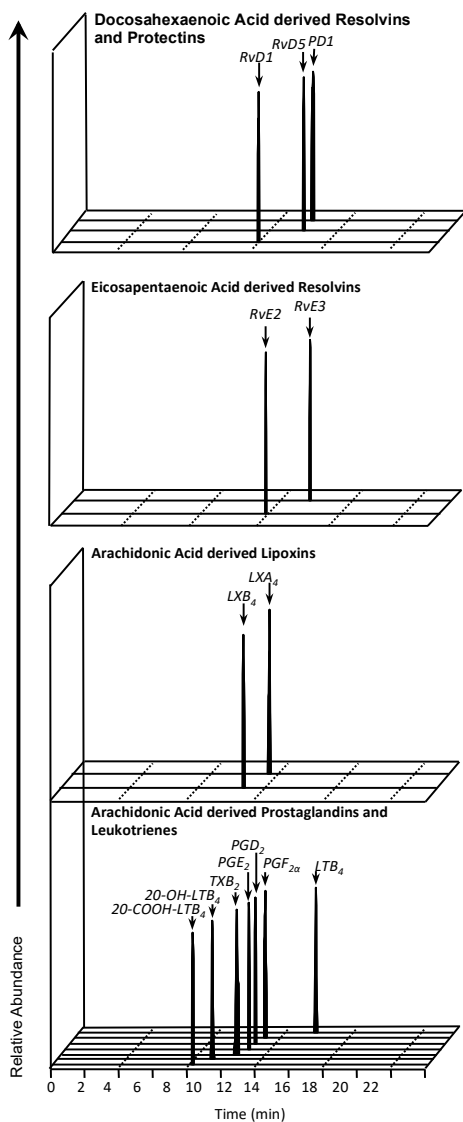

**Supplementary Figure 7. Representative multiple reaction monitoring (MRM) chromatographs for lipids in the supernatant above neutrophil swarms.** The lipid mediators are identified from the signature ion fragments ( $m/z$ ) for each molecule monitoring the parent ion (Q1) and a characteristic daughter ion (Q3). A minimum of 6 diagnostic ions were employed for each identification. Calibration curves were determined using a mixture of synthetic lipid mediator standards obtained via total organic synthesis. The detection limit was  $\sim 0.1$  pg for each lipid mediator.

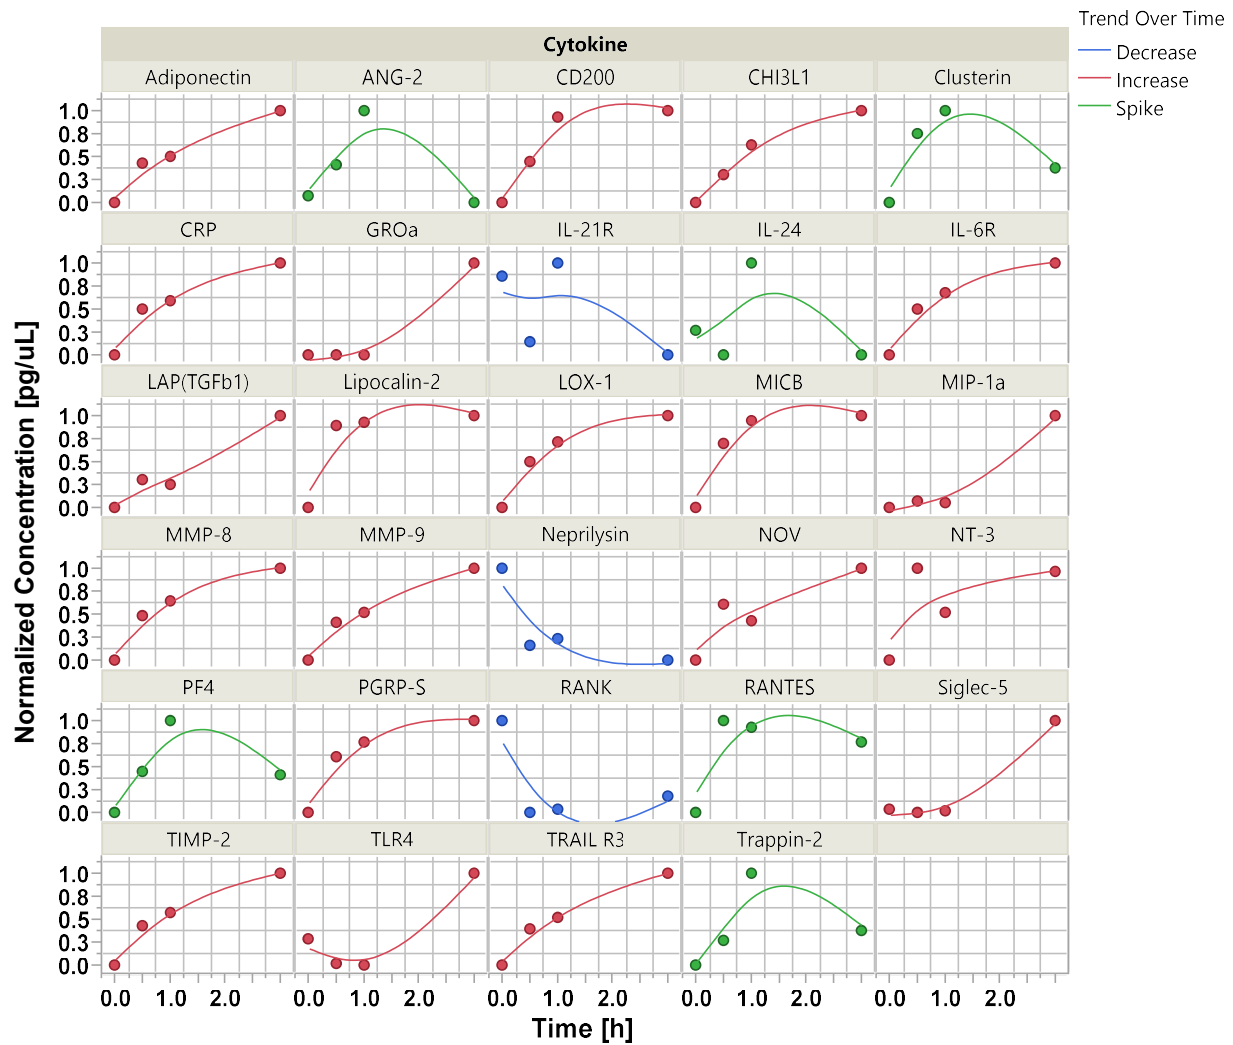

**Supplementary Figure 8. Quantification of cytokine secretion dynamics of neutrophils during swarming.** Cytokines were also identified during phagocytosis and were statistically significant from non-stimulated neutrophils ( $p < 0.05$ ).

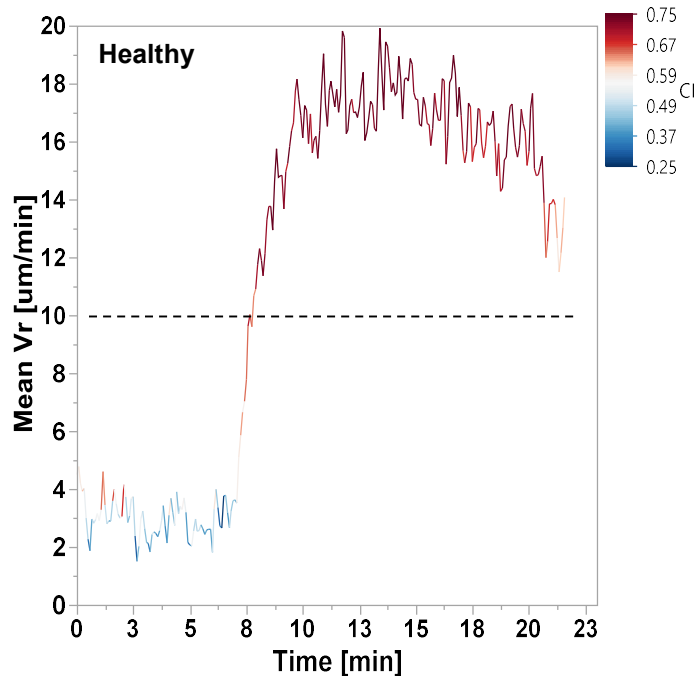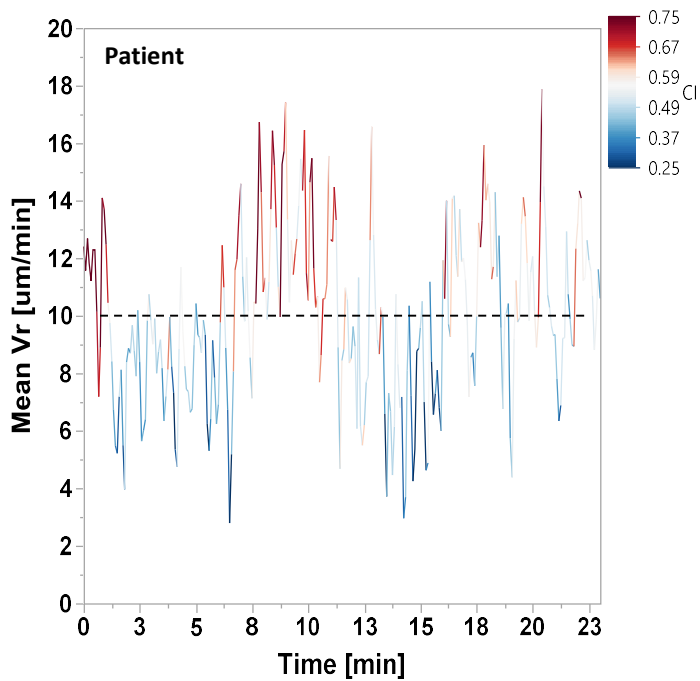

**Supplementary Figure 9. Comparison of neutrophil migration profiles from a healthy individual and trauma patients. Radial velocity ( $V_r$ ) of neutrophil from healthy individuals shows a sharp transition from slow to fast at the initiation of swarming,**

consistent with the increase in directionality index. Radial velocity shows wide swings around an intermediate velocity during swarming of neutrophils from trauma patients.

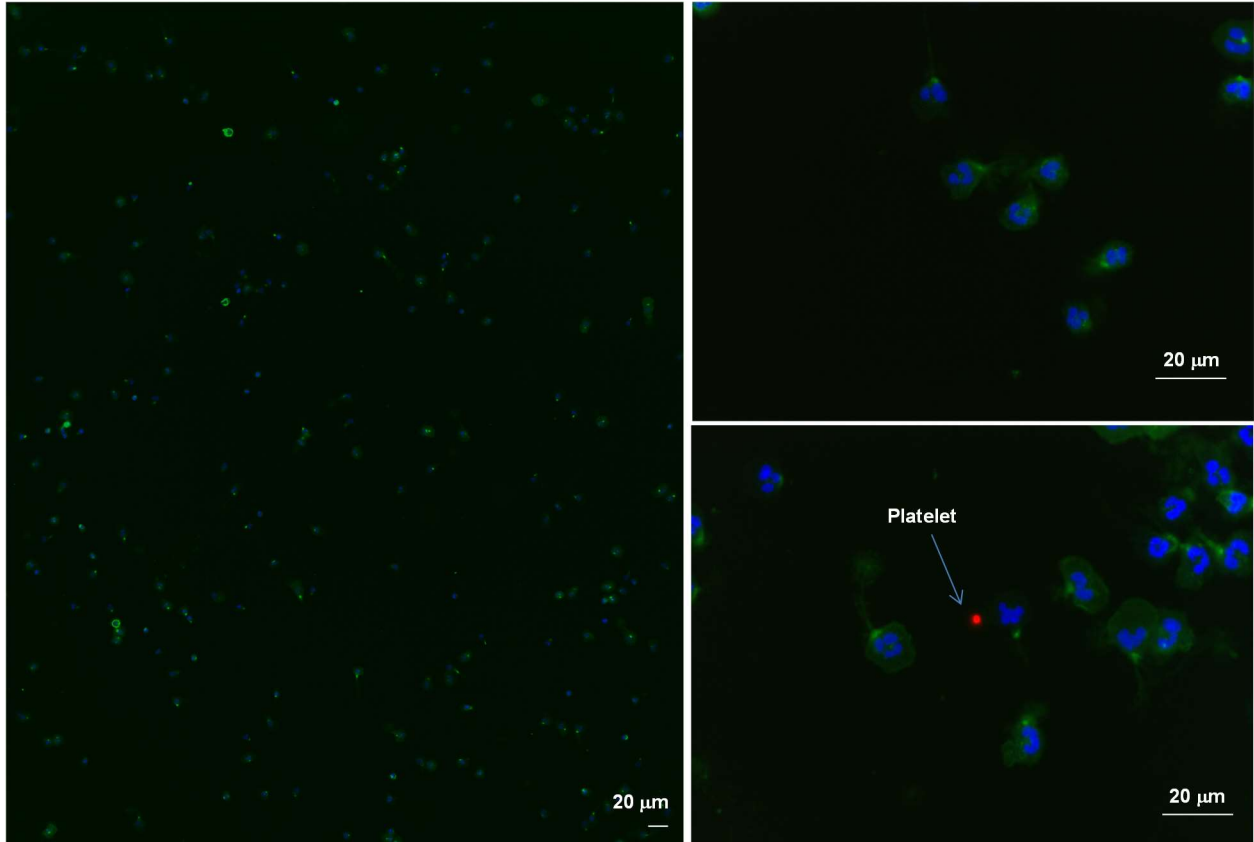

**Supplementary Figure 10. Stained neutrophils after isolation.** Neutrophils were stained for CD66b (in green) and platelets for CD61 (Red), the nuclear stain was performed with Hoechst. Less than 1 % of isolated neutrophils carried platelets.

## Supplementary Tables

**Supplementary Table 1.** Demographic information for the healthy donors used for the measurements reported in Figure 1f.

| <b>Donor</b> | <b>Age</b> | <b>Sex</b> | <b>Scouting phase [min]</b> | <b>Growth phase [min]</b> | <b>Plateau Size [<math>\mu\text{m}^2</math>]</b> |
|--------------|------------|------------|-----------------------------|---------------------------|--------------------------------------------------|
| <b>A</b>     | 28         | M          | $8 \pm 3$                   | $53 \pm 7$                | $2256 \pm 121$                                   |
| <b>B</b>     | 24         | M          | $39 \pm 6$                  | $70 \pm 6$                | $1639 \pm 102$                                   |
| <b>C</b>     | 35         | M          | $74 \pm 5$                  | $50 \pm 5$                | $1769 \pm 97$                                    |
| <b>D</b>     | 29         | F          | $10 \pm 6$                  | $47 \pm 2$                | $1965 \pm 74$                                    |
| <b>E</b>     | 25         | F          | $7 \pm 4$                   | $53 \pm 8$                | $1634 \pm 134$                                   |
| <b>F</b>     | 35         | M          | $13 \pm 6$                  | $49 \pm 6$                | $1732 \pm 86$                                    |
| <b>G</b>     | 26         | F          | $10 \pm 3$                  | $61 \pm 3$                | $1812 \pm 97$                                    |
| <b>H</b>     | 35         | M          | $9 \pm 4$                   | $45 \pm 5$                | $1034 \pm 113$                                   |



**Supplementary Table 2.** Lipid mediators identified during neutrophil swarming. Results are shown in pg per 500  $\mu$ L supernatant solution.

| <b>DHA Bioactive Metabolome</b>     | Q1  | Q3  | 30 min          | 60 min          | 180 min         | Control        |
|-------------------------------------|-----|-----|-----------------|-----------------|-----------------|----------------|
| RvD1                                | 375 | 121 | 0.1 $\pm$ 0.0   | 0.3 $\pm$ 0.1   | 0.1 $\pm$ 0.1   | 0.1 $\pm$ 0.1  |
| RvD2                                | 375 | 141 | *               | *               | *               | *              |
| RvD3                                | 375 | 147 | *               | *               | *               | *              |
| RvD4                                | 375 | 101 | *               | *               | *               | *              |
| RvD5                                | 359 | 199 | 0.1 $\pm$ 0.0   | 0.1 $\pm$ 0.0   | 0.1 $\pm$ 0.0   | 0.1 $\pm$ 0.0  |
| RvD6                                | 359 | 101 | *               | *               | *               | *              |
| AT-RvD1                             | 375 | 121 | *               | *               | *               | *              |
| AT-RvD3                             | 375 | 147 | *               | *               | *               | *              |
| PD1                                 | 359 | 153 | 0.5 $\pm$ 0.1   | 0.5 $\pm$ 0.1   | 0.6 $\pm$ 0.0   | 0.7 $\pm$ 0.0  |
| AT-PD1                              | 359 | 153 | *               | *               | *               | *              |
| 10S,17S-diHDHA                      | 359 | 153 | *               | *               | *               | *              |
| MaR1                                | 359 | 250 | *               | *               | *               | *              |
| <b>EPA Bioactive Metabolome</b>     |     |     |                 |                 |                 |                |
| RvE1                                | 349 | 195 | *               | *               | *               | *              |
| RvE2                                | 333 | 253 | 4.5 $\pm$ 0.3   | 5.3 $\pm$ 1.4   | 5.1 $\pm$ 0.7   | 4.1 $\pm$ 0.0  |
| RvE3                                | 333 | 245 | 2.5 $\pm$ 0.2   | 2.2 $\pm$ 0.8   | 2.8 $\pm$ 0.9   | 0.0 $\pm$ 0.0  |
| <b>AA Bioactive Metabolome</b>      |     |     |                 |                 |                 |                |
| LXA <sub>4</sub>                    | 351 | 115 | 0.4 $\pm$ 0.0   | 0.6 $\pm$ 0.1   | 11.4 $\pm$ 5.3  | 0.1 $\pm$ 0.0  |
| LXB <sub>4</sub>                    | 351 | 251 | 0.2 $\pm$ 0.0   | 0.2 $\pm$ 0.0   | 0.3 $\pm$ 0.1   | 0.1 $\pm$ 0.0  |
| 5S,15S-diHETE                       | 335 | 235 | 1.9 $\pm$ 0.6   | 1.8 $\pm$ 0.8   | 2.5 $\pm$ 1.0   | 1.0 $\pm$ 0.0  |
| AT-LXA <sub>4</sub>                 | 351 | 115 | *               | *               | *               | *              |
| AT-LXB <sub>4</sub>                 | 351 | 251 | *               | *               | *               | *              |
| LTB <sub>4</sub>                    | 335 | 195 | 3.2 $\pm$ 1.9   | 4.4 $\pm$ 1.0   | 2.8 $\pm$ 0.8   | 0.1 $\pm$ 0.0  |
| 20-OH-LTB <sub>4</sub>              | 351 | 195 | 4.0 $\pm$ 2.8   | 9.9 $\pm$ 1.9   | 13.7 $\pm$ 2.3  | *              |
| 20-COOH-LTB <sub>4</sub>            | 365 | 195 | 5.6 $\pm$ 0.2   | 4.1 $\pm$ 0.8   | 3.2 $\pm$ 0.6   | 3.5 $\pm$ 0.0  |
| PGD <sub>2</sub>                    | 351 | 189 | 2.8 $\pm$ 1.1   | 2.5 $\pm$ 0.9   | 1.7 $\pm$ 0.7   | 0.3 $\pm$ 0.0  |
| PGE <sub>2</sub>                    | 351 | 189 | 2.5 $\pm$ 1.1   | 2.5 $\pm$ 1.2   | 2.6 $\pm$ 0.9   | 0.2 $\pm$ 0.0  |
| PGF <sub>2<math>\alpha</math></sub> | 353 | 193 | 0.3 $\pm$ 0.1   | 0.7 $\pm$ 0.1   | 0.3 $\pm$ 0.0   | 0.1 $\pm$ 0.0  |
| TXB <sub>2</sub>                    | 369 | 169 | 77.9 $\pm$ 62.3 | 79.6 $\pm$ 64.5 | 69.8 $\pm$ 55.9 | 12.4 $\pm$ 0.0 |

Supernatants from neutrophil incubations were collected for metabololipidomics at the indicated intervals. Mediators were identified and quantified using LC-MS-MS-based lipid mediator metabololipidomics. Mediators were quantified using multiple reaction monitoring

where Q1: M-H (parent ion) and Q3 (daughter ion): diagnostic ion in the MS-MS. The detection limit was ~ 0.1 pg; \* denotes below limits. Results are mean  $\pm$  SEM 4 donors per interval.

**Supplementary Table 3.** A complete list of cytokine tested in microarray ELISA. Tables include the limit of detection, confidence range, maximum values for quantitative measurements, a summary of measurements relative to the limit of detection and maximum values.

**Group 1**

| Target       | LOD (pg/ml) | Best Confident Range | Maximum Value | Highest Reported Value | Lowest Reported Value | % Below LOD | % Above LOD but <3xLOD | % in Best Confidence | % Above Maximum |
|--------------|-------------|----------------------|---------------|------------------------|-----------------------|-------------|------------------------|----------------------|-----------------|
| 6Ckine       | 173.4       | 520.1 - 40000        | 40,000        | 0.0                    | 0.0                   | 100.0       | 0.0                    | 0.0                  | 0.0             |
| Axl          | 10.1        | 30.4 - 4000          | 4,000         | 0.0                    | 0.0                   | 100.0       | 0.0                    | 0.0                  | 0.0             |
| BTC          | 94.8        | 284.3 - 20000        | 20,000        | 0.0                    | 0.0                   | 100.0       | 0.0                    | 0.0                  | 0.0             |
| CCL28        | 116.6       | 349.8 - 40000        | 40,000        | 0.0                    | 0.0                   | 100.0       | 0.0                    | 0.0                  | 0.0             |
| CTACK        | 41.3        | 124 - 5555           | 16,667        | 12.7                   | 0.0                   | 100.0       | 0.0                    | 0.0                  | 0.0             |
| CXCL16       | 15.8        | 47.4 - 2222          | 6,667         | 7.8                    | 0.0                   | 100.0       | 0.0                    | 0.0                  | 0.0             |
| ENA-78       | 32.4        | 97.1 - 10000         | 10,000        | 3.3                    | 0.0                   | 100.0       | 0.0                    | 0.0                  | 0.0             |
| Eotaxin-3    | 42.8        | 128.4 - 6666         | 20,000        | 9.5                    | 0.0                   | 100.0       | 0.0                    | 0.0                  | 0.0             |
| GCP-2        | 10.6        | 31.8 - 10000         | 10,000        | 17.1                   | 0.0                   | 92.3        | 7.7                    | 0.0                  | 0.0             |
| GRO          | 4.9         | 14.8 - 1000          | 1,000         | 0.6                    | 0.0                   | 100.0       | 0.0                    | 0.0                  | 0.0             |
| HCC-1        | 3.4         | 10.3 - 1333          | 4,000         | 1.7                    | 0.3                   | 100.0       | 0.0                    | 0.0                  | 0.0             |
| HCC-4        | 20.9        | 62.7 - 3333          | 10,000        | 8.1                    | 0.0                   | 100.0       | 0.0                    | 0.0                  | 0.0             |
| IL-9         | 651.5       | 1954.4 - 200000      | 200,000       | 455.3                  | 0.0                   | 100.0       | 0.0                    | 0.0                  | 0.0             |
| IL-17F       | 70.3        | 210.8 - 100000       | 100,000       | 3.8                    | 0.0                   | 100.0       | 0.0                    | 0.0                  | 0.0             |
| IL-18 BPa    | 132.9       | 398.8 - 60000        | 60,000        | 9.4                    | 0.0                   | 100.0       | 0.0                    | 0.0                  | 0.0             |
| IL-28A       | 12.1        | 36.4 - 10000         | 10,000        | 0.6                    | 0.0                   | 100.0       | 0.0                    | 0.0                  | 0.0             |
| IL-29        | 393.5       | 1180.4 - 100000      | 100,000       | 280.5                  | 0.0                   | 100.0       | 0.0                    | 0.0                  | 0.0             |
| IL-31        | 95.9        | 287.8 - 40000        | 40,000        | 182.3                  | 0.0                   | 76.9        | 23.1                   | 0.0                  | 0.0             |
| IP-10        | 9.4         | 28.3 - 3333          | 10,000        | 2.3                    | 0.0                   | 100.0       | 0.0                    | 0.0                  | 0.0             |
| I-TAC        | 19.2        | 57.5 - 3333          | 10,000        | 11.8                   | 0.0                   | 100.0       | 0.0                    | 0.0                  | 0.0             |
| LIF          | 37.8        | 113.3 - 13000        | 13,000        | 14.1                   | 0.0                   | 100.0       | 0.0                    | 0.0                  | 0.0             |
| LIGHT        | 18.3        | 54.9 - 10000         | 10,000        | 0.0                    | 0.0                   | 100.0       | 0.0                    | 0.0                  | 0.0             |
| Lymphotactin | 113.7       | 341.2 - 11111        | 33,333        | 46.4                   | 0.0                   | 100.0       | 0.0                    | 0.0                  | 0.0             |
| MCP-2        | 1.4         | 4.3 - 222            | 667           | 0.3                    | 0.0                   | 100.0       | 0.0                    | 0.0                  | 0.0             |
| MCP-3        | 3.5         | 10.4 - 444           | 1,333         | 1.1                    | 0.0                   | 100.0       | 0.0                    | 0.0                  | 0.0             |
| MCP-4        | 5.4         | 16.1 - 370           | 1,111         | 0.2                    | 0.0                   | 100.0       | 0.0                    | 0.0                  | 0.0             |
| MDC          | 5.5         | 16.4 - 1111          | 3,333         | 0.1                    | 0.0                   | 100.0       | 0.0                    | 0.0                  | 0.0             |
| MIF          | 8.3         | 24.9 - 4000          | 4,000         | 26.9                   | 8.5                   | 0.0         | 92.3                   | 7.7                  | 0.0             |
| MIP-3a       | 3.4         | 10.2 - 4000          | 4,000         | 0.3                    | 0.0                   | 100.0       | 0.0                    | 0.0                  | 0.0             |
| MIP-3b       | 31.0        | 92.9 - 2222          | 6,667         | 0.0                    | 0.0                   | 100.0       | 0.0                    | 0.0                  | 0.0             |
| MPIF-1       | 32.8        | 98.3 - 10000         | 10,000        | 44.5                   | 0.0                   | 84.6        | 15.4                   | 0.0                  | 0.0             |
| MSP          | 119.3       | 357.9 - 33333        | 100,000       | 27.0                   | 0.0                   | 100.0       | 0.0                    | 0.0                  | 0.0             |
| NAP-2        | 4.0         | 11.9 - 148           | 444           | 154.8                  | 0.0                   | 7.7         | 0.0                    | 92.3                 | 0.0             |
| OPN          | 161.4       | 484.1 - 100000       | 100,000       | 695.9                  | 0.0                   | 84.6        | 0.0                    | 15.4                 | 0.0             |
| PARC         | 12.8        | 38.4 - 4000          | 4,000         | 5.8                    | 0.0                   | 100.0       | 0.0                    | 0.0                  | 0.0             |
| PF4          | 177.6       | 532.8 - 11111        | 33,333        | 13,227.2               | 0.0                   | 7.7         | 7.7                    | 84.6                 | 0.0             |
| SDF-1a       | 7.4         | 22.3 - 1111          | 3,333         | 0.5                    | 0.0                   | 100.0       | 0.0                    | 0.0                  | 0.0             |

|      |       |               |         |       |     |              |     |     |     |
|------|-------|---------------|---------|-------|-----|--------------|-----|-----|-----|
| TARC | 7.7   | 23.1 - 1111   | 3,333   | 1.4   | 0.0 | <b>100.0</b> | 0.0 | 0.0 | 0.0 |
| TECK | 220.8 | 662.4 - 33333 | 100,000 | 194.3 | 0.0 | <b>100.0</b> | 0.0 | 0.0 | 0.0 |
| TSLP | 8.3   | 24.9 - 1111   | 3,333   | 2.6   | 0.8 | <b>100.0</b> | 0.0 | 0.0 | 0.0 |

## Group 2

| Target      | LOD (pg/ml) | Best Confident Range | Maximum Value | Highest Reported Value | Lowest Reported Value | % Below LOD | % Above LOD but <3xLOD | % in Best Confidence | % Above Maximum |
|-------------|-------------|----------------------|---------------|------------------------|-----------------------|-------------|------------------------|----------------------|-----------------|
| Activin A   | 110.8       | 332.3 - 11111        | 33,333        | 168.0                  | 13.8                  | 15.4        | 84.6                   | 0.0                  | 0.0             |
| AgRP        | 21.7        | 65 - 1111            | 3,333         | 4.3                    | 0.0                   | 100.0       | 0.0                    | 0.0                  | 0.0             |
| Angiogenin  | 1.1         | 3.4 - 666            | 2,000         | 4.8                    | 0.0                   | 84.6        | 7.7                    | 7.7                  | 0.0             |
| ANG-1       | 27.3        | 81.8 - 40000         | 40,000        | 27.4                   | 1.3                   | 92.3        | 7.7                    | 0.0                  | 0.0             |
| Angiostatin | 2851.8      | 8555.5 - 1000000     | 1,000,000     | 1,097.7                | 0.0                   | 100.0       | 0.0                    | 0.0                  | 0.0             |
| Cathepsin S | 8.7         | 26 - 10000           | 10,000        | 139.0                  | 6.0                   | 7.7         | 30.8                   | 61.5                 | 0.0             |
| CD40        | 7.8         | 23.5 - 10000         | 10,000        | 5.4                    | 0.0                   | 100.0       | 0.0                    | 0.0                  | 0.0             |
| Cripto-1    | 35.0        | 105 - 10000          | 10,000        | 3.9                    | 0.0                   | 100.0       | 0.0                    | 0.0                  | 0.0             |
| DAN         | 39.6        | 118.9 - 40000        | 40,000        | 17.6                   | 0.0                   | 100.0       | 0.0                    | 0.0                  | 0.0             |
| DKK-1       | 198.1       | 594.2 - 80000        | 80,000        | 165.0                  | 0.0                   | 100.0       | 0.0                    | 0.0                  | 0.0             |
| E-Cadherin  | 373.6       | 1120.7 - 80000       | 80,000        | 12.0                   | 0.0                   | 100.0       | 0.0                    | 0.0                  | 0.0             |
| EpCAM       | 10.5        | 31.4 - 20000         | 20,000        | 0.4                    | 0.0                   | 100.0       | 0.0                    | 0.0                  | 0.0             |
| FAS L       | 1.8         | 5.4 - 2000           | 2,000         | 5.0                    | 0.0                   | 92.3        | 7.7                    | 0.0                  | 0.0             |
| Fcg RIIBC   | 31.2        | 93.7 - 10000         | 10,000        | 52.8                   | 0.0                   | 92.3        | 7.7                    | 0.0                  | 0.0             |
| Follistatin | 43.2        | 129.6 - 13333        | 40,000        | 2.7                    | 0.0                   | 100.0       | 0.0                    | 0.0                  | 0.0             |
| Galectin-7  | 217.5       | 652.4 - 100000       | 100,000       | 388.1                  | 84.1                  | 76.9        | 23.1                   | 0.0                  | 0.0             |
| ICAM-2      | 58.5        | 175.6 - 100000       | 100,000       | 671.2                  | 302.8                 | 0.0         | 0.0                    | 100.0                | 0.0             |
| IL-13 R1    | 53.1        | 159.2 - 10000        | 10,000        | 5.9                    | 0.0                   | 100.0       | 0.0                    | 0.0                  | 0.0             |
| IL-13 R2    | 92.8        | 278.5 - 20000        | 20,000        | 14.6                   | 0.0                   | 100.0       | 0.0                    | 0.0                  | 0.0             |
| IL-17B      | 32.8        | 98.3 - 40000         | 40,000        | 0.0                    | 0.0                   | 100.0       | 0.0                    | 0.0                  | 0.0             |
| IL-2 Ra     | 26.8        | 80.3 - 10000         | 10,000        | 2.6                    | 0.0                   | 100.0       | 0.0                    | 0.0                  | 0.0             |
| IL-2 Rb     | 234.6       | 703.7 - 33333        | 100,000       | 54.0                   | 0.0                   | 100.0       | 0.0                    | 0.0                  | 0.0             |
| IL-23       | 148.9       | 446.6 - 40000        | 40,000        | 84.0                   | 0.0                   | 100.0       | 0.0                    | 0.0                  | 0.0             |
| LAP(TGFB1 ) | 7.0         | 20.9 - 4000          | 4,000         | 14.5                   | 2.2                   | 61.5        | 38.5                   | 0.0                  | 0.0             |
| NrCAM       | 29.2        | 87.6 - 20000         | 20,000        | 1.9                    | 0.0                   | 100.0       | 0.0                    | 0.0                  | 0.0             |
| PAI-1       | 48.3        | 144.9 - 40000        | 40,000        | 165.1                  | 0.0                   | 53.8        | 38.5                   | 7.7                  | 0.0             |
| PDGF-AB     | 10.3        | 30.9 - 10000         | 10,000        | 11.2                   | 0.0                   | 61.5        | 38.5                   | 0.0                  | 0.0             |
| Resistin    | 31.1        | 93.3 - 20000         | 20,000        | 111.9                  | 0.0                   | 30.8        | 30.8                   | 38.5                 | 0.0             |
| SDF-1b      | 26.6        | 79.7 - 4444          | 13,333        | 3.8                    | 0.0                   | 100.0       | 0.0                    | 0.0                  | 0.0             |
| gp130       | 101.0       | 303.1 - 80000        | 80,000        | 213.8                  | 0.0                   | 84.6        | 15.4                   | 0.0                  | 0.0             |
| Shh-N       | 38.2        | 114.7 - 40000        | 40,000        | 3.9                    | 0.0                   | 100.0       | 0.0                    | 0.0                  | 0.0             |
| Siglec-5    | 29.8        | 89.5 - 10000         | 10,000        | 755.6                  | 0.0                   | 46.2        | 15.4                   | 38.5                 | 0.0             |
| ST2         | 10.6        | 31.7 - 4000          | 4,000         | 7.8                    | 0.0                   | 100.0       | 0.0                    | 0.0                  | 0.0             |
| TGFB2       | 35.2        | 105.7 - 4444         | 13,333        | 12.1                   | 0.0                   | 100.0       | 0.0                    | 0.0                  | 0.0             |
| Tie-2       | 21.0        | 62.9 - 10000         | 10,000        | 4.5                    | 0.0                   | 100.0       | 0.0                    | 0.0                  | 0.0             |
| TPO         | 218.0       | 653.9 - 66666        | 200,000       | 171.9                  | 0.0                   | 100.0       | 0.0                    | 0.0                  | 0.0             |
| TRAIL R4    | 22.8        | 68.5 - 8000          | 8,000         | 0.0                    | 0.0                   | 100.0       | 0.0                    | 0.0                  | 0.0             |
| TREM-1      | 42.2        | 126.7 - 20000        | 20,000        | 1.6                    | 0.0                   | 100.0       | 0.0                    | 0.0                  | 0.0             |
| VEGF-C      | 38.2        | 114.7 - 20000        | 20,000        | 22.5                   | 0.0                   | 100.0       | 0.0                    | 0.0                  | 0.0             |
| VEGF R1     | 89.5        | 268.6 - 40000        | 40,000        | 119.1                  | 15.0                  | 61.5        | 38.5                   | 0.0                  | 0.0             |

### Group 3

| Target        | LOD (pg/ml) | Best Confident Range | Maximum Value | Highest Reported Value | Lowest Reported Value | % Below LOD | % Above LOD but <3xLOD | % in Best Confidence | % Above Maximum |
|---------------|-------------|----------------------|---------------|------------------------|-----------------------|-------------|------------------------|----------------------|-----------------|
| Adiponectin   | 168.0       | 503.9 - 100000       | 100,000       | 258.7                  | 0.0                   | 84.6        | 15.4                   | 0.0                  | 0.0             |
| Adipsin       | 38.4        | 115.1 - 20000        | 20,000        | 4,418.0                | 0.0                   | 53.8        | 15.4                   | 30.8                 | 0.0             |
| AFP           | 41.6        | 124.8 - 10000        | 10,000        | 15.2                   | 0.0                   | 100.0       | 0.0                    | 0.0                  | 0.0             |
| ANGPTL4       | 122.1       | 366.2 - 400000       | 400,000       | 54.7                   | 0.0                   | 100.0       | 0.0                    | 0.0                  | 0.0             |
| B2M           | 4.5         | 13.4 - 370           | 1,111         | 168.6                  | 60.7                  | 0.0         | 0.0                    | 100.0                | 0.0             |
| BCAM          | 88.8        | 266.4 - 40000        | 40,000        | 55.3                   | 0.0                   | 100.0       | 0.0                    | 0.0                  | 0.0             |
| CA125         | 206.5       | 619.5 - 100000       | 100,000       | 218.0                  | 0.0                   | 92.3        | 7.7                    | 0.0                  | 0.0             |
| CA15-3        | 17.1        | 51.2 - 10000         | 30,000        | 0.5                    | 0.0                   | 100.0       | 0.0                    | 0.0                  | 0.0             |
| CEA           | 53.3        | 159.8 - 20000        | 20,000        | 463.1                  | 19.7                  | 30.8        | 23.1                   | 46.2                 | 0.0             |
| CRP           | 15.9        | 47.8 - 10000         | 10,000        | 123.7                  | 0.0                   | 46.2        | 23.1                   | 30.8                 | 0.0             |
| ErbB2         | 30.9        | 92.7 - 10000         | 10,000        | 2.6                    | 0.0                   | 100.0       | 0.0                    | 0.0                  | 0.0             |
| Ferritin      | 6106.2      | 18318.7 - 800000     | 800,000       | 43,387.3               | 0.0                   | 23.1        | 38.5                   | 38.5                 | 0.0             |
| FSH           | 22.1        | 66.2 - 10000         | 10,000        | 15.9                   | 0.0                   | 100.0       | 0.0                    | 0.0                  | 0.0             |
| GROa          | 92.4        | 277.3 - 33333        | 100,000       | 9.9                    | 0.0                   | 100.0       | 0.0                    | 0.0                  | 0.0             |
| hCGb          | 74.2        | 222.7 - 20000        | 20,000        | 0.0                    | 0.0                   | 100.0       | 0.0                    | 0.0                  | 0.0             |
| IGF-1R        | 78.4        | 235.3 - 100000       | 100,000       | 77.0                   | 0.0                   | 100.0       | 0.0                    | 0.0                  | 0.0             |
| IL-1 RII      | 73.2        | 219.5 - 20000        | 20,000        | 17.3                   | 0.0                   | 100.0       | 0.0                    | 0.0                  | 0.0             |
| IL-3          | 11.5        | 34.4 - 10000         | 10,000        | 31.7                   | 0.0                   | 30.8        | 69.2                   | 0.0                  | 0.0             |
| IL-18 Rb      | 21.1        | 63.3 - 20000         | 20,000        | 1.8                    | 0.0                   | 100.0       | 0.0                    | 0.0                  | 0.0             |
| IL-21         | 340.6       | 1021.7 - 100000      | 100,000       | 2,817.7                | 0.0                   | 30.8        | 7.7                    | 61.5                 | 0.0             |
| Leptin        | 24.1        | 72.4 - 13333         | 40,000        | 17.6                   | 0.0                   | 100.0       | 0.0                    | 0.0                  | 0.0             |
| MMP-1         | 51.5        | 154.5 - 40000        | 40,000        | 0.0                    | 0.0                   | 100.0       | 0.0                    | 0.0                  | 0.0             |
| MMP-2         | 481.6       | 1444.8 - 100000      | 100,000       | 6,929.9                | 0.0                   | 38.5        | 23.1                   | 38.5                 | 0.0             |
| MMP-3         | 135.9       | 407.7 - 13333        | 40,000        | 48.0                   | 0.0                   | 100.0       | 0.0                    | 0.0                  | 0.0             |
| MMP-8         | 18.9        | 56.7 - 10000         | 10,000        | 6,501.1                | 2.4                   | 7.7         | 15.4                   | 76.9                 | 0.0             |
| MMP-9         | 24.8        | 74.5 - 20000         | 20,000        | 113,144.9              | 0.0                   | 7.7         | 0.0                    | 30.8                 | 61.5            |
| MMP-10        | 5.2         | 15.7 - 10000         | 10,000        | 5.3                    | 0.0                   | 92.3        | 7.7                    | 0.0                  | 0.0             |
| MMP-13        | 5.5         | 16.6 - 3333          | 10,000        | 2.2                    | 0.0                   | 100.0       | 0.0                    | 0.0                  | 0.0             |
| NCAM-1        | 322.0       | 966.1 - 66666        | 200,000       | 447.8                  | 0.0                   | 92.3        | 7.7                    | 0.0                  | 0.0             |
| Nidogen-1     | 59.6        | 178.8 - 20000        | 20,000        | 699.9                  | 0.0                   | 46.2        | 15.4                   | 38.5                 | 0.0             |
| NSE           | 95.5        | 286.6 - 33333        | 100,000       | 76.3                   | 0.0                   | 100.0       | 0.0                    | 0.0                  | 0.0             |
| OSM           | 25.1        | 75.2 - 10000         | 10,000        | 58.4                   | 0.0                   | 92.3        | 7.7                    | 0.0                  | 0.0             |
| Procalcitonin | 647.0       | 1941.1 - 100000      | 100,000       | 4,012.7                | 305.1                 | 7.7         | 53.8                   | 38.5                 | 0.0             |
| Prolactin     | 853.9       | 2561.7 - 400000      | 400,000       | 2,003.6                | 0.0                   | 92.3        | 7.7                    | 0.0                  | 0.0             |
| PSA-free      | 78.4        | 235.3 - 20000        | 20,000        | 0.4                    | 0.0                   | 100.0       | 0.0                    | 0.0                  | 0.0             |
| Siglec-9      | 80.5        | 241.4 - 40000        | 40,000        | 43.4                   | 0.0                   | 100.0       | 0.0                    | 0.0                  | 0.0             |
| TACE          | 95.3        | 285.9 - 100000       | 100,000       | 484.5                  | 0.0                   | 46.2        | 30.8                   | 23.1                 | 0.0             |
| Thyroglobulin | 845.3       | 2535.9 - 100000      | 100,000       | 3,332.7                | 0.0                   | 61.5        | 30.8                   | 7.7                  | 0.0             |
| TIMP-4        | 15.9        | 47.6 - 6666          | 20,000        | 4.7                    | 0.0                   | 100.0       | 0.0                    | 0.0                  | 0.0             |
| TSH           | 41.1        | 123.4 - 20000        | 20,000        | 256.1                  | 0.0                   | 30.8        | 30.8                   | 38.5                 | 0.0             |

## Group 4

| Target         | LOD (pg/ml) | Best Confident Range | Maximum Value | Highest Reported Value | Lowest Reported Value | % Below LOD | % Above LOD but <3xLOD | % in Best Confidence | % Above Maximum |
|----------------|-------------|----------------------|---------------|------------------------|-----------------------|-------------|------------------------|----------------------|-----------------|
| 2B4            | 22.6        | 67.9 - 10000         | 10,000        | 3.9                    | 0.0                   | 100.0       | 0.0                    | 0.0                  | 0.0             |
| ADAM9          | 44.2        | 132.7 - 33333        | 100,000       | 1.4                    | 0.0                   | 100.0       | 0.0                    | 0.0                  | 0.0             |
| ANG-2          | 44.5        | 133.6 - 20000        | 20,000        | 6.2                    | 0.2                   | 100.0       | 0.0                    | 0.0                  | 0.0             |
| APRIL          | 774.9       | 2324.8 - 200000      | 200,000       | 7,036.4                | 0.0                   | 23.1        | 23.1                   | 53.8                 | 0.0             |
| BMP-2          | 56.0        | 168.1 - 33333        | 100,000       | 18.5                   | 0.9                   | 100.0       | 0.0                    | 0.0                  | 0.0             |
| BMP-9          | 8.9         | 26.8 - 4000          | 4,000         | 1.3                    | 0.0                   | 100.0       | 0.0                    | 0.0                  | 0.0             |
| C5a            | 12.3        | 37 - 10000           | 10,000        | 22.3                   | 1.0                   | 53.8        | 46.2                   | 0.0                  | 0.0             |
| Cathepsin L    | 19.3        | 58 - 10000           | 10,000        | 8.5                    | 0.0                   | 100.0       | 0.0                    | 0.0                  | 0.0             |
| CD200          | 116.2       | 348.5 - 100000       | 100,000       | 82.9                   | 0.0                   | 100.0       | 0.0                    | 0.0                  | 0.0             |
| CD97           | 239.4       | 718.2 - 100000       | 100,000       | 577.4                  | 62.4                  | 69.2        | 30.8                   | 0.0                  | 0.0             |
| Chemerin       | 521.7       | 1565 - 22222         | 66,667        | 883.8                  | 56.5                  | 61.5        | 38.5                   | 0.0                  | 0.0             |
| DcR3           | 545.2       | 1635.7 - 66666       | 200,000       | 489.5                  | 0.0                   | 100.0       | 0.0                    | 0.0                  | 0.0             |
| FABP2          | 63.6        | 190.7 - 100000       | 100,000       | 56.9                   | 0.0                   | 100.0       | 0.0                    | 0.0                  | 0.0             |
| FAP            | 15.2        | 45.7 - 20000         | 20,000        | 40.2                   | 3.0                   | 38.5        | 61.5                   | 0.0                  | 0.0             |
| FGF-19         | 76.5        | 229.6 - 20000        | 20,000        | 167.4                  | 0.0                   | 92.3        | 7.7                    | 0.0                  | 0.0             |
| Galectin-3     | 12.8        | 38.4 - 4000          | 4,000         | 106.2                  | 0.0                   | 69.2        | 7.7                    | 23.1                 | 0.0             |
| HGF R          | 10.2        | 30.5 - 4000          | 4,000         | 30.0                   | 0.2                   | 69.2        | 30.8                   | 0.0                  | 0.0             |
| IFNab R2       | 692.8       | 2078.3 - 100000      | 100,000       | 415.7                  | 0.0                   | 100.0       | 0.0                    | 0.0                  | 0.0             |
| IGF-2          | 133.4       | 400.2 - 100000       | 100,000       | 119.9                  | 0.0                   | 100.0       | 0.0                    | 0.0                  | 0.0             |
| IGF-2R         | 84.8        | 254.5 - 20000        | 20,000        | 124.8                  | 0.0                   | 76.9        | 23.1                   | 0.0                  | 0.0             |
| IL-1 R6        | 488.7       | 1466 - 100000        | 100,000       | 369.9                  | 0.0                   | 100.0       | 0.0                    | 0.0                  | 0.0             |
| IL-24          | 82.6        | 247.9 - 33333        | 100,000       | 9.5                    | 0.0                   | 100.0       | 0.0                    | 0.0                  | 0.0             |
| IL-33          | 17.5        | 52.6 - 10000         | 10,000        | 1.6                    | 0.0                   | 100.0       | 0.0                    | 0.0                  | 0.0             |
| Kallikrein 14  | 7.6         | 22.7 - 4000          | 4,000         | 1.4                    | 0.0                   | 100.0       | 0.0                    | 0.0                  | 0.0             |
| Legumain       | 24.1        | 72.3 - 10000         | 10,000        | 17.2                   | 0.0                   | 100.0       | 0.0                    | 0.0                  | 0.0             |
| LOX-1          | 3.9         | 11.8 - 2000          | 2,000         | 912.0                  | 1.8                   | 15.4        | 7.7                    | 76.9                 | 0.0             |
| MBL            | 1.2         | 3.6 - 1000           | 1,000         | 7.6                    | 0.0                   | 38.5        | 53.8                   | 7.7                  | 0.0             |
| Neprilysin     | 37.2        | 111.6 - 20000        | 20,000        | 9.1                    | 0.0                   | 100.0       | 0.0                    | 0.0                  | 0.0             |
| Notch-1        | 10.7        | 32.2 - 4000          | 4,000         | 9.3                    | 0.0                   | 100.0       | 0.0                    | 0.0                  | 0.0             |
| NOV            | 11.6        | 34.7 - 4000          | 4,000         | 33.7                   | 8.3                   | 23.1        | 76.9                   | 0.0                  | 0.0             |
| Osteoactivin   | 18.4        | 55.3 - 10000         | 10,000        | 18.9                   | 8.2                   | 84.6        | 15.4                   | 0.0                  | 0.0             |
| PD-1           | 13.8        | 41.3 - 4000          | 4,000         | 18.3                   | 0.0                   | 61.5        | 38.5                   | 0.0                  | 0.0             |
| PGRP-S         | 1.2         | 3.6 - 1000           | 1,000         | 2,162.4                | 1.6                   | 0.0         | 7.7                    | 38.5                 | 53.8            |
| Serpin A4      | 14.8        | 44.4 - 10000         | 10,000        | 1,984.3                | 1,080.5               | 0.0         | 0.0                    | 100.0                | 0.0             |
| sFRP-3         | 315.3       | 945.9 - 100000       | 100,000       | 580.8                  | 0.0                   | 46.2        | 53.8                   | 0.0                  | 0.0             |
| Thrombomodulin | 90.1        | 270.2 - 33333        | 100,000       | 111.3                  | 1.0                   | 84.6        | 15.4                   | 0.0                  | 0.0             |
| TLR2           | 39.9        | 119.7 - 20000        | 20,000        | 25.4                   | 0.0                   | 100.0       | 0.0                    | 0.0                  | 0.0             |
| TRAIL R1       | 52.0        | 156 - 10000          | 10,000        | 38.6                   | 0.0                   | 100.0       | 0.0                    | 0.0                  | 0.0             |
| Transferrin    | 94.5        | 283.4 - 11111        | 33,333        | 3.7                    | 0.9                   | 100.0       | 0.0                    | 0.0                  | 0.0             |
| WIF-1          | 47.9        | 143.6 - 20000        | 20,000        | 50.1                   | 0.8                   | 92.3        | 7.7                    | 0.0                  | 0.0             |

## Group 5

| Target       | LOD (pg/ml) | Best Confident Range | Maximum Value | Highest Reported Value | Lowest Reported Value | % Below LOD | % Above LOD but <3xLOD | % in Best Confidence | % Above Maximum |
|--------------|-------------|----------------------|---------------|------------------------|-----------------------|-------------|------------------------|----------------------|-----------------|
| ACE-2        | 656.0       | 1968.1 - 400000      | 400,000       | 0.0                    | 0.0                   | 100.0       | 0.0                    | 0.0                  | 0.0             |
| Albumin      | 165.4       | 496.1 - 20000        | 20,000        | 10,723.4               | 7,021.7               | 0.0         | 0.0                    | 100.0                | 0.0             |
| AMICA        | 34.5        | 103.4 - 20000        | 20,000        | 581.5                  | 0.0                   | 76.9        | 0.0                    | 23.1                 | 0.0             |
| ANG-4        | 30.3        | 90.9 - 20000         | 20,000        | 5.5                    | 0.0                   | 100.0       | 0.0                    | 0.0                  | 0.0             |
| BAFF         | 8.7         | 26 - 10000           | 10,000        | 2.4                    | 0.0                   | 100.0       | 0.0                    | 0.0                  | 0.0             |
| CA19-9       | 553.2       | 1659.7 - 100000      | 100,000       | 3,428.5                | 186.4                 | 53.8        | 30.8                   | 15.4                 | 0.0             |
| CD163        | 176.2       | 528.5 - 200000       | 200,000       | 0.0                    | 0.0                   | 100.0       | 0.0                    | 0.0                  | 0.0             |
| Clusterin    | 7.2         | 21.6 - 10000         | 10,000        | 172.2                  | 0.0                   | 15.4        | 15.4                   | 69.2                 | 0.0             |
| CRTAM        | 4.1         | 12.2 - 4000          | 4,000         | 30.0                   | 0.0                   | 84.6        | 7.7                    | 7.7                  | 0.0             |
| CXCL14       | 85.5        | 256.5 - 33333        | 100,000       | 138.4                  | 0.0                   | 84.6        | 15.4                   | 0.0                  | 0.0             |
| Cystatin C   | 55.1        | 165.4 - 11111        | 33,333        | 5.1                    | 0.0                   | 100.0       | 0.0                    | 0.0                  | 0.0             |
| Decorin      | 2.1         | 6.3 - 2000           | 2,000         | 36.6                   | 0.0                   | 61.5        | 15.4                   | 23.1                 | 0.0             |
| Dkk-3        | 45.8        | 137.4 - 11111        | 33,333        | 0.2                    | 0.0                   | 100.0       | 0.0                    | 0.0                  | 0.0             |
| DLL1         | 24.2        | 72.6 - 20000         | 20,000        | 9.2                    | 0.0                   | 100.0       | 0.0                    | 0.0                  | 0.0             |
| Fetuin A     | 401.2       | 1203.5 - 100000      | 100,000       | 242,239.6              | 190,166.9             | 0.0         | 0.0                    | 0.0                  | 100.0           |
| aFGF         | 297.0       | 891 - 22222          | 66,667        | 0.0                    | 0.0                   | 100.0       | 0.0                    | 0.0                  | 0.0             |
| FOLR1        | 70.1        | 210.4 - 33333        | 100,000       | 363.7                  | 0.0                   | 53.8        | 15.4                   | 30.8                 | 0.0             |
| Furin        | 335.9       | 1007.7 - 200000      | 200,000       | 40.0                   | 0.0                   | 100.0       | 0.0                    | 0.0                  | 0.0             |
| GASP-1       | 7.7         | 23.2 - 2000          | 2,000         | 6.5                    | 0.0                   | 100.0       | 0.0                    | 0.0                  | 0.0             |
| GASP-2       | 67.8        | 203.4 - 33333        | 100,000       | 12.8                   | 0.0                   | 100.0       | 0.0                    | 0.0                  | 0.0             |
| G-CSF R      | 22.5        | 67.4 - 10000         | 10,000        | 0.7                    | 0.0                   | 100.0       | 0.0                    | 0.0                  | 0.0             |
| HAI-2        | 21.2        | 63.7 - 40000         | 40,000        | 2.9                    | 0.0                   | 100.0       | 0.0                    | 0.0                  | 0.0             |
| IL-17B R     | 106.5       | 319.6 - 100000       | 100,000       | 0.0                    | 0.0                   | 100.0       | 0.0                    | 0.0                  | 0.0             |
| IL-27        | 7.3         | 21.8 - 10000         | 10,000        | 1.9                    | 0.0                   | 100.0       | 0.0                    | 0.0                  | 0.0             |
| LAG-3        | 515.1       | 1545.3 - 100000      | 100,000       | 118.6                  | 0.0                   | 100.0       | 0.0                    | 0.0                  | 0.0             |
| LDL R        | 1.0         | 3 - 2000             | 2,000         | 0.1                    | 0.0                   | 100.0       | 0.0                    | 0.0                  | 0.0             |
| Pepsinogen I | 22.0        | 66.1 - 2222          | 6,667         | 13.5                   | 0.0                   | 100.0       | 0.0                    | 0.0                  | 0.0             |
| RANK         | 195.0       | 585 - 100000         | 100,000       | 198.1                  | 0.0                   | 92.3        | 7.7                    | 0.0                  | 0.0             |
| RBP4         | 15.4        | 46.2 - 2222          | 6,667         | 9,076.6                | 7,955.0               | 0.0         | 0.0                    | 0.0                  | 100.0           |
| SOST         | 78.9        | 236.8 - 13333        | 40,000        | 0.0                    | 0.0                   | 100.0       | 0.0                    | 0.0                  | 0.0             |
| Syndecan-1   | 67.8        | 203.3 - 33333        | 100,000       | 481.0                  | 155.2                 | 0.0         | 15.4                   | 84.6                 | 0.0             |
| TACI         | 118.9       | 356.8 - 40000        | 40,000        | 124.1                  | 0.0                   | 92.3        | 7.7                    | 0.0                  | 0.0             |
| TFPI         | 35.5        | 106.4 - 11111        | 33,333        | 0.3                    | 0.0                   | 100.0       | 0.0                    | 0.0                  | 0.0             |
| TSP-1        | 286.7       | 860.1 - 100000       | 100,000       | 15,871.7               | 0.0                   | 15.4        | 0.0                    | 84.6                 | 0.0             |
| TRAIL R2     | 9.7         | 29.2 - 4000          | 4,000         | 8.8                    | 0.0                   | 100.0       | 0.0                    | 0.0                  | 0.0             |
| TRANCE       | 101.2       | 303.5 - 40000        | 40,000        | 0.0                    | 0.0                   | 100.0       | 0.0                    | 0.0                  | 0.0             |
| Troponin I   | 578.4       | 1735.2 - 200000      | 200,000       | 87.6                   | 0.0                   | 100.0       | 0.0                    | 0.0                  | 0.0             |
| uPA          | 7.0         | 21 - 4000            | 4,000         | 77.7                   | 16.5                  | 0.0         | 23.1                   | 76.9                 | 0.0             |
| VE-Cadherin  | 277.1       | 831.3 - 200000       | 200,000       | 0.0                    | 0.0                   | 100.0       | 0.0                    | 0.0                  | 0.0             |
| WISP-1       | 159.2       | 477.7 - 22222        | 66,667        | 0.0                    | 0.0                   | 100.0       | 0.0                    | 0.0                  | 0.0             |



## Group 6

| Target      | LOD (pg/ml) | Best Confident Range | Maximum Value | Highest Reported Value | Lowest Reported Value | % Below LOD | % Above LOD but <3xLOD | % in Best Confidence | % Above Maximum |
|-------------|-------------|----------------------|---------------|------------------------|-----------------------|-------------|------------------------|----------------------|-----------------|
| ANGPTL3     | 91.9        | 275.7 - 10000        | 10,000        | 397.9                  | 0.0                   | 69.2        | 15.4                   | 15.4                 | 0.0             |
| bIG-H3      | 33.8        | 101.4 - 10000        | 10,000        | 19.4                   | 0.0                   | 100.0       | 0.0                    | 0.0                  | 0.0             |
| CA9         | 25.3        | 75.8 - 10000         | 10,000        | 16.8                   | 0.0                   | 100.0       | 0.0                    | 0.0                  | 0.0             |
| Cathepsin B | 26.2        | 78.5 - 10000         | 10,000        | 20.3                   | 0.0                   | 100.0       | 0.0                    | 0.0                  | 0.0             |
| CD23        | 36.7        | 110.2 - 10000        | 10,000        | 5.7                    | 0.0                   | 100.0       | 0.0                    | 0.0                  | 0.0             |
| CHI3L1      | 18.9        | 56.8 - 10000         | 10,000        | 2,266.4                | 12.4                  | 7.7         | 38.5                   | 53.8                 | 0.0             |
| CTLA4       | 15.8        | 47.3 - 4000          | 4,000         | 34.1                   | 0.0                   | 84.6        | 15.4                   | 0.0                  | 0.0             |
| Dkk-4       | 88.9        | 266.8 - 11111        | 33,333        | 54.2                   | 0.0                   | 100.0       | 0.0                    | 0.0                  | 0.0             |
| DPPIV       | 404.1       | 1212.2 - 200000      | 200,000       | 117.0                  | 0.0                   | 100.0       | 0.0                    | 0.0                  | 0.0             |
| EDA-A2      | 12.6        | 37.8 - 10000         | 10,000        | 1.9                    | 0.0                   | 100.0       | 0.0                    | 0.0                  | 0.0             |
| Epo R       | 90.6        | 271.8 - 40000        | 40,000        | 0.0                    | 0.0                   | 100.0       | 0.0                    | 0.0                  | 0.0             |
| FGF-6       | 32.6        | 97.7 - 10000         | 10,000        | 19.2                   | 0.0                   | 100.0       | 0.0                    | 0.0                  | 0.0             |
| FGF-9       | 17.4        | 52.2 - 4000          | 4,000         | 7.9                    | 0.0                   | 100.0       | 0.0                    | 0.0                  | 0.0             |
| Gas 1       | 69.2        | 207.7 - 100000       | 100,000       | 56.5                   | 0.0                   | 100.0       | 0.0                    | 0.0                  | 0.0             |
| IGFBP-5     | 818.9       | 2456.6 - 200000      | 200,000       | 1,121.7                | 0.0                   | 76.9        | 23.1                   | 0.0                  | 0.0             |
| IL-1 F5     | 186.8       | 560.4 - 200000       | 200,000       | 51.8                   | 0.0                   | 100.0       | 0.0                    | 0.0                  | 0.0             |
| IL-1 F6     | 299.6       | 898.7 - 100000       | 100,000       | 388.7                  | 0.0                   | 92.3        | 7.7                    | 0.0                  | 0.0             |
| IL-1 F7     | 206.1       | 618.4 - 100000       | 100,000       | 76.3                   | 0.0                   | 100.0       | 0.0                    | 0.0                  | 0.0             |
| IL-1 F8     | 8.9         | 26.6 - 4000          | 4,000         | 14.3                   | 0.0                   | 69.2        | 30.8                   | 0.0                  | 0.0             |
| IL-1 F9     | 395.1       | 1185.3 - 100000      | 100,000       | 2,634.5                | 0.0                   | 76.9        | 0.0                    | 23.1                 | 0.0             |
| IL-1 F10    | 1165.1      | 3495.2 - 200000      | 200,000       | 1,304.7                | 0.0                   | 69.2        | 30.8                   | 0.0                  | 0.0             |
| IL-1 R5     | 1.3         | 4 - 1000             | 1,000         | 20.8                   | 0.0                   | 69.2        | 15.4                   | 15.4                 | 0.0             |
| IL-17C      | 164.5       | 493.5 - 133333       | 400,000       | 38.0                   | 0.0                   | 100.0       | 0.0                    | 0.0                  | 0.0             |
| IL-18       | 44.5        | 133.6 - 40000        | 40,000        | 3.3                    | 0.0                   | 100.0       | 0.0                    | 0.0                  | 0.0             |
| IL-20       | 46.2        | 138.6 - 11111        | 33,333        | 40.9                   | 0.4                   | 100.0       | 0.0                    | 0.0                  | 0.0             |
| IL-34       | 33.0        | 98.9 - 40000         | 40,000        | 18.0                   | 0.0                   | 100.0       | 0.0                    | 0.0                  | 0.0             |
| IL-5 Ra     | 592.4       | 1777.1 - 400000      | 400,000       | 484.6                  | 0.0                   | 100.0       | 0.0                    | 0.0                  | 0.0             |
| IL-10 Ra    | 932.7       | 2798.1 - 200000      | 200,000       | 241.3                  | 0.0                   | 100.0       | 0.0                    | 0.0                  | 0.0             |
| Layilin     | 21.4        | 64.1 - 10000         | 10,000        | 53.6                   | 0.0                   | 92.3        | 7.7                    | 0.0                  | 0.0             |
| Leptin R    | 65.6        | 196.8 - 100000       | 100,000       | 449.9                  | 0.0                   | 84.6        | 7.7                    | 7.7                  | 0.0             |
| Marapsin    | 83.6        | 250.7 - 20000        | 20,000        | 167.6                  | 0.0                   | 38.5        | 61.5                   | 0.0                  | 0.0             |
| Mer         | 54.0        | 162 - 10000          | 10,000        | 82.2                   | 0.0                   | 76.9        | 23.1                   | 0.0                  | 0.0             |
| MMP-7       | 63.1        | 189.4 - 33333        | 100,000       | 148.4                  | 0.0                   | 69.2        | 30.8                   | 0.0                  | 0.0             |
| P-Cadherin  | 113.8       | 341.4 - 100000       | 100,000       | 93.3                   | 0.0                   | 100.0       | 0.0                    | 0.0                  | 0.0             |
| Prostasin   | 45.4        | 136.1 - 20000        | 20,000        | 72.5                   | 0.0                   | 92.3        | 7.7                    | 0.0                  | 0.0             |
| PSMA        | 111.8       | 335.5 - 100000       | 100,000       | 180.5                  | 0.0                   | 84.6        | 15.4                   | 0.0                  | 0.0             |
| SIGIRR      | 349.7       | 1049 - 100000        | 100,000       | 103.8                  | 0.0                   | 100.0       | 0.0                    | 0.0                  | 0.0             |
| TGFb RIII   | 38.3        | 114.9 - 20000        | 20,000        | 374.6                  | 0.0                   | 84.6        | 7.7                    | 7.7                  | 0.0             |
| TF          | 4.5         | 13.6 - 4000          | 4,000         | 4.6                    | 0.3                   | 92.3        | 7.7                    | 0.0                  | 0.0             |
| TWEAK       | 122.1       | 366.4 - 100000       | 100,000       | 217.0                  | 13.7                  | 53.8        | 46.2                   | 0.0                  | 0.0             |

## Group 7

| Target             | LOD (pg/ml) | Best Confident Range | Maximum Value | Highest Reported Value | Lowest Reported Value | % Below LOD | % Above LOD but <3xLOD | % in Best Confidence | % Above Maximum |
|--------------------|-------------|----------------------|---------------|------------------------|-----------------------|-------------|------------------------|----------------------|-----------------|
| ADAMTS13           | 275.8       | 827.3 - 100000       | 100,000       | 540.6                  | 0.0                   | 46.2        | 53.8                   | 0.0                  | 0.0             |
| Aggrecan           | 48.4        | 145.1 - 20000        | 20,000        | 0.6                    | 0.0                   | 100.0       | 0.0                    | 0.0                  | 0.0             |
| Angiotensinogen    | 472.5       | 1417.6 - 100000      | 100,000       | 8,494.0                | 2,761.1               | 0.0         | 0.0                    | 100.0                | 0.0             |
| B7-H1              | 35.4        | 106.3 - 10000        | 10,000        | 7.0                    | 0.0                   | 100.0       | 0.0                    | 0.0                  | 0.0             |
| BMPR-IA            | 205.4       | 616.3 - 100000       | 100,000       | 357.3                  | 0.0                   | 76.9        | 23.1                   | 0.0                  | 0.0             |
| BMPR-II            | 219.8       | 659.4 - 100000       | 100,000       | 283.7                  | 0.0                   | 92.3        | 7.7                    | 0.0                  | 0.0             |
| Cadherin-11        | 1088.8      | 3266.3 - 400000      | 400,000       | 912.6                  | 0.0                   | 100.0       | 0.0                    | 0.0                  | 0.0             |
| CD27               | 19.5        | 58.5 - 10000         | 10,000        | 10.0                   | 0.0                   | 100.0       | 0.0                    | 0.0                  | 0.0             |
| CD6                | 522.0       | 1566 - 100000        | 100,000       | 60.8                   | 0.0                   | 100.0       | 0.0                    | 0.0                  | 0.0             |
| Ck beta 8-1        | 112.1       | 336.2 - 33333        | 100,000       | 7.7                    | 0.0                   | 100.0       | 0.0                    | 0.0                  | 0.0             |
| CNTF               | 143.7       | 431 - 100000         | 100,000       | 140.9                  | 0.0                   | 100.0       | 0.0                    | 0.0                  | 0.0             |
| DNAM-1             | 312.4       | 937.3 - 100000       | 100,000       | 787.0                  | 0.0                   | 84.6        | 15.4                   | 0.0                  | 0.0             |
| EMMPRIN            | 8.1         | 24.3 - 2000          | 2,000         | 23.6                   | 8.8                   | 0.0         | 100.0                  | 0.0                  | 0.0             |
| FLRG               | 25.1        | 75.4 - 10000         | 10,000        | 17.4                   | 0.0                   | 100.0       | 0.0                    | 0.0                  | 0.0             |
| Follistatin-like 1 | 1094.0      | 3282.1 - 400000      | 400,000       | 42.6                   | 0.0                   | 100.0       | 0.0                    | 0.0                  | 0.0             |
| Fractalkine        | 229.8       | 689.5 - 40000        | 40,000        | 123.0                  | 0.0                   | 100.0       | 0.0                    | 0.0                  | 0.0             |
| Galectin-1         | 89.9        | 269.7 - 20000        | 20,000        | 97.2                   | 3.0                   | 92.3        | 7.7                    | 0.0                  | 0.0             |
| GITR L             | 382.2       | 1146.5 - 200000      | 200,000       | 180.3                  | 0.0                   | 100.0       | 0.0                    | 0.0                  | 0.0             |
| Granulysin         | 21.5        | 64.5 - 4000          | 4,000         | 19.0                   | 0.0                   | 100.0       | 0.0                    | 0.0                  | 0.0             |
| IL-1 R3            | 16.6        | 49.8 - 10000         | 10,000        | 24.7                   | 10.6                  | 69.2        | 30.8                   | 0.0                  | 0.0             |
| IL-15 R            | 7.6         | 22.8 - 2000          | 2,000         | 30.2                   | 0.0                   | 46.2        | 46.2                   | 7.7                  | 0.0             |
| IL-17E             | 66.9        | 200.6 - 40000        | 40,000        | 52.0                   | 0.0                   | 100.0       | 0.0                    | 0.0                  | 0.0             |
| IL-32 alpha        | 10.4        | 31.1 - 4000          | 4,000         | 3.3                    | 0.0                   | 100.0       | 0.0                    | 0.0                  | 0.0             |
| L1CAM-2            | 689.0       | 2067 - 200000        | 200,000       | 1,935.9                | 0.0                   | 69.2        | 30.8                   | 0.0                  | 0.0             |
| LRIG3              | 967.2       | 2901.7 - 200000      | 200,000       | 24.2                   | 0.0                   | 100.0       | 0.0                    | 0.0                  | 0.0             |
| LRP-6              | 386.6       | 1159.9 - 200000      | 200,000       | 1,262.8                | 0.0                   | 61.5        | 23.1                   | 15.4                 | 0.0             |
| MEPE               | 203.8       | 611.5 - 200000       | 200,000       | 88.4                   | 0.0                   | 100.0       | 0.0                    | 0.0                  | 0.0             |
| Nectin-4           | 140.1       | 420.2 - 20000        | 20,000        | 218.3                  | 0.0                   | 69.2        | 30.8                   | 0.0                  | 0.0             |
| Periostin          | 679.0       | 2037 - 200000        | 200,000       | 149.4                  | 0.0                   | 100.0       | 0.0                    | 0.0                  | 0.0             |
| Persephin          | 421.5       | 1264.4 - 100000      | 100,000       | 68.0                   | 0.0                   | 100.0       | 0.0                    | 0.0                  | 0.0             |
| Renin              | 12.6        | 37.7 - 3333          | 10,000        | 5.6                    | 0.0                   | 100.0       | 0.0                    | 0.0                  | 0.0             |
| RGM-B              | 144.0       | 432 - 100000         | 100,000       | 77.5                   | 0.0                   | 100.0       | 0.0                    | 0.0                  | 0.0             |
| ROBO3              | 7.4         | 22.1 - 2000          | 2,000         | 2.9                    | 0.0                   | 100.0       | 0.0                    | 0.0                  | 0.0             |
| S100A8             | 7.7         | 23.1 - 10000         | 10,000        | 2.1                    | 0.0                   | 100.0       | 0.0                    | 0.0                  | 0.0             |
| Siglec-7           | 10.8        | 32.4 - 2000          | 2,000         | 19.1                   | 0.0                   | 92.3        | 7.7                    | 0.0                  | 0.0             |
| Syndecan-3         | 447.9       | 1343.6 - 100000      | 100,000       | 81.5                   | 0.0                   | 100.0       | 0.0                    | 0.0                  | 0.0             |
| Thrombospondin-2   | 28.2        | 84.6 - 10000         | 10,000        | 115.5                  | 0.0                   | 46.2        | 15.4                   | 38.5                 | 0.0             |
| Thrombospondin-5   | 28.1        | 84.2 - 10000         | 10,000        | 34.0                   | 0.0                   | 92.3        | 7.7                    | 0.0                  | 0.0             |
| Tie-1              | 28.8        | 86.4 - 10000         | 10,000        | 63.1                   | 0.0                   | 61.5        | 38.5                   | 0.0                  | 0.0             |
| ULBP-2             | 11.3        | 33.9 - 4000          | 4,000         | 53.5                   | 0.0                   | 46.2        | 30.8                   | 23.1                 | 0.0             |

## Group 8

| Target       | LOD (pg/ml) | Best Confident Range | Maximum Value | Highest Reported Value | Lowest Reported Value | % Below LOD | % Above LOD but <3xLOD | % in Best Confidence | % Above Maximum |
|--------------|-------------|----------------------|---------------|------------------------|-----------------------|-------------|------------------------|----------------------|-----------------|
| ADAM8        | 320.2       | 960.6 - 100000       | 100,000       | 34.9                   | 0.0                   | 100.0       | 0.0                    | 0.0                  | 0.0             |
| ADAM12       | 56.5        | 169.4 - 20000        | 20,000        | 1.8                    | 0.0                   | 100.0       | 0.0                    | 0.0                  | 0.0             |
| B7-H3        | 21.1        | 63.4 - 4000          | 4,000         | 59.5                   | 0.0                   | 76.9        | 23.1                   | 0.0                  | 0.0             |
| BMPR-IB      | 20.4        | 61.2 - 10000         | 10,000        | 642.3                  | 0.0                   | 46.2        | 23.1                   | 30.8                 | 0.0             |
| Cadherin-4   | 14.3        | 42.9 - 10000         | 10,000        | 51.1                   | 0.0                   | 76.9        | 15.4                   | 7.7                  | 0.0             |
| Cadherin-13  | 190.9       | 572.8 - 100000       | 100,000       | 1,037.1                | 0.0                   | 61.5        | 15.4                   | 23.1                 | 0.0             |
| CD48         | 238.2       | 714.7 - 200000       | 200,000       | 406.0                  | 0.0                   | 84.6        | 15.4                   | 0.0                  | 0.0             |
| CD58         | 406.8       | 1220.3 - 100000      | 100,000       | 236.1                  | 0.0                   | 100.0       | 0.0                    | 0.0                  | 0.0             |
| CD84         | 467.9       | 1403.8 - 100000      | 100,000       | 1,260.0                | 0.0                   | 46.2        | 53.8                   | 0.0                  | 0.0             |
| CD99         | 4.7         | 14 - 4000            | 4,000         | 3.2                    | 0.0                   | 100.0       | 0.0                    | 0.0                  | 0.0             |
| CD155        | 310.6       | 931.8 - 100000       | 100,000       | 4,117.0                | 0.0                   | 23.1        | 23.1                   | 53.8                 | 0.0             |
| CD229        | 19.4        | 58.3 - 10000         | 10,000        | 12.6                   | 0.0                   | 100.0       | 0.0                    | 0.0                  | 0.0             |
| CEACAM-5     | 179.4       | 538.2 - 100000       | 100,000       | 346.3                  | 0.0                   | 84.6        | 15.4                   | 0.0                  | 0.0             |
| CF XIV       | 21.2        | 63.5 - 20000         | 20,000        | 33.8                   | 0.0                   | 92.3        | 7.7                    | 0.0                  | 0.0             |
| Cystatin A   | 7.6         | 22.8 - 4000          | 4,000         | 20.2                   | 0.0                   | 92.3        | 7.7                    | 0.0                  | 0.0             |
| Cystatin B   | 15.8        | 47.3 - 4000          | 4,000         | 75.8                   | 0.0                   | 30.8        | 30.8                   | 38.5                 | 0.0             |
| Cystatin E M | 25.2        | 75.6 - 1111          | 3,333         | 16.5                   | 0.0                   | 100.0       | 0.0                    | 0.0                  | 0.0             |
| Desmoglein 2 | 57.5        | 172.5 - 20000        | 20,000        | 103.5                  | 0.0                   | 84.6        | 15.4                   | 0.0                  | 0.0             |
| DR3          | 179.6       | 538.7 - 100000       | 100,000       | 74.0                   | 0.0                   | 100.0       | 0.0                    | 0.0                  | 0.0             |
| ErbB4        | 34.4        | 103.1 - 10000        | 10,000        | 0.0                    | 0.0                   | 100.0       | 0.0                    | 0.0                  | 0.0             |
| ESAM         | 43.6        | 130.7 - 10000        | 10,000        | 80.3                   | 0.0                   | 84.6        | 15.4                   | 0.0                  | 0.0             |
| FGF-21       | 5.1         | 15.4 - 4000          | 4,000         | 6.4                    | 0.0                   | 92.3        | 7.7                    | 0.0                  | 0.0             |
| Galectin-2   | 32.0        | 95.9 - 20000         | 20,000        | 25.6                   | 0.0                   | 100.0       | 0.0                    | 0.0                  | 0.0             |
| Galectin-9   | 10.3        | 30.8 - 10000         | 10,000        | 3.7                    | 0.0                   | 100.0       | 0.0                    | 0.0                  | 0.0             |
| ICOS         | 231.8       | 695.5 - 100000       | 100,000       | 272.4                  | 0.0                   | 92.3        | 7.7                    | 0.0                  | 0.0             |
| JAM-A        | 3.2         | 9.6 - 4000           | 4,000         | 0.6                    | 0.0                   | 100.0       | 0.0                    | 0.0                  | 0.0             |
| JAM-B        | 13.0        | 39.1 - 10000         | 10,000        | 0.7                    | 0.0                   | 100.0       | 0.0                    | 0.0                  | 0.0             |
| Kallikrein 5 | 20.4        | 61.2 - 10000         | 10,000        | 76.0                   | 0.0                   | 92.3        | 0.0                    | 7.7                  | 0.0             |
| Midkine      | 53.1        | 159.4 - 6666         | 20,000        | 4.3                    | 0.0                   | 100.0       | 0.0                    | 0.0                  | 0.0             |
| Pentraxin 3  | 11.4        | 34.1 - 10000         | 10,000        | 244.1                  | 0.0                   | 53.8        | 15.4                   | 30.8                 | 0.0             |
| Pref-1       | 149.6       | 448.7 - 100000       | 100,000       | 121.1                  | 0.0                   | 100.0       | 0.0                    | 0.0                  | 0.0             |
| Siglec-10    | 575.7       | 1727.1 - 200000      | 200,000       | 0.0                    | 0.0                   | 100.0       | 0.0                    | 0.0                  | 0.0             |
| SLAM         | 136.0       | 408.1 - 100000       | 100,000       | 72.6                   | 0.0                   | 100.0       | 0.0                    | 0.0                  | 0.0             |
| SP-D         | 31.8        | 95.3 - 20000         | 20,000        | 37.2                   | 0.0                   | 92.3        | 7.7                    | 0.0                  | 0.0             |
| Syndecan-4   | 3.1         | 9.2 - 1000           | 1,000         | 4.7                    | 0.0                   | 92.3        | 7.7                    | 0.0                  | 0.0             |
| Testican 2   | 42.9        | 128.8 - 40000        | 40,000        | 90.4                   | 0.0                   | 84.6        | 15.4                   | 0.0                  | 0.0             |
| TIM-3        | 14.6        | 43.7 - 10000         | 10,000        | 127.8                  | 0.0                   | 84.6        | 7.7                    | 7.7                  | 0.0             |
| TLR4         | 114.8       | 344.4 - 200000       | 200,000       | 6.3                    | 0.0                   | 100.0       | 0.0                    | 0.0                  | 0.0             |
| TRAIL        | 2.2         | 6.5 - 2000           | 2,000         | 3.8                    | 0.0                   | 92.3        | 7.7                    | 0.0                  | 0.0             |
| ULBP-1       | 27.1        | 81.3 - 20000         | 20,000        | 63.5                   | 5.0                   | 76.9        | 23.1                   | 0.0                  | 0.0             |

## Group 9

| Target  | LOD (pg/ml) | Best Confident Range | Maximum Value | Highest Reported Value | Lowest Reported Value | % Below LOD | % Above LOD but <3xLOD | % in Best Confidence | % Above Maximum |
|---------|-------------|----------------------|---------------|------------------------|-----------------------|-------------|------------------------|----------------------|-----------------|
| AR      | 5.2         | 15.6 - 10000         | 10,000        | 36.3                   | 0.0                   | 46.2        | 15.4                   | 38.5                 | 0.0             |
| BDNF    | 1.8         | 5.5 - 666            | 2,000         | 0.3                    | 0.0                   | 100.0       | 0.0                    | 0.0                  | 0.0             |
| bFGF    | 37.0        | 110.9 - 20000        | 20,000        | 153.6                  | 0.0                   | 46.2        | 23.1                   | 30.8                 | 0.0             |
| BMP-4   | 49.9        | 149.7 - 33333        | 100,000       | 40.9                   | 1.7                   | 100.0       | 0.0                    | 0.0                  | 0.0             |
| BMP-5   | 324.4       | 973.3 - 100000       | 100,000       | 0.0                    | 0.0                   | 100.0       | 0.0                    | 0.0                  | 0.0             |
| BMP-7   | 63.3        | 189.9 - 40000        | 40,000        | 22.1                   | 0.0                   | 100.0       | 0.0                    | 0.0                  | 0.0             |
| b-NGF   | 4.5         | 13.5 - 1111          | 3,333         | 0.0                    | 0.0                   | 100.0       | 0.0                    | 0.0                  | 0.0             |
| EGF     | 0.1         | 0.4 - 200            | 200           | 0.3                    | 0.0                   | 53.8        | 46.2                   | 0.0                  | 0.0             |
| EGF R   | 5.6         | 16.7 - 10000         | 10,000        | 39.5                   | 13.9                  | 0.0         | 23.1                   | 76.9                 | 0.0             |
| EG-VEGF | 6.5         | 19.4 - 10000         | 10,000        | 13.9                   | 0.0                   | 84.6        | 15.4                   | 0.0                  | 0.0             |
| FGF-4   | 162.0       | 485.9 - 11111        | 33,333        | 300.2                  | 0.0                   | 76.9        | 23.1                   | 0.0                  | 0.0             |
| FGF-7   | 18.7        | 56.1 - 10000         | 10,000        | 7.1                    | 0.0                   | 100.0       | 0.0                    | 0.0                  | 0.0             |
| GDF-15  | 1.2         | 3.6 - 2000           | 2,000         | 0.5                    | 0.0                   | 100.0       | 0.0                    | 0.0                  | 0.0             |
| GDNF    | 11.9        | 35.7 - 4000          | 4,000         | 3.4                    | 0.0                   | 100.0       | 0.0                    | 0.0                  | 0.0             |
| GH      | 21.9        | 65.7 - 10000         | 10,000        | 8.6                    | 0.0                   | 100.0       | 0.0                    | 0.0                  | 0.0             |
| HB-EGF  | 14.0        | 42.1 - 3333          | 10,000        | 0.0                    | 0.0                   | 100.0       | 0.0                    | 0.0                  | 0.0             |
| HGF     | 10.7        | 32 - 4000            | 4,000         | 8.9                    | 0.0                   | 100.0       | 0.0                    | 0.0                  | 0.0             |
| IGFBP-1 | 16.1        | 48.4 - 5000          | 5,000         | 4.7                    | 0.0                   | 100.0       | 0.0                    | 0.0                  | 0.0             |
| IGFBP-2 | 41.9        | 125.7 - 20000        | 20,000        | 65.1                   | 0.0                   | 84.6        | 15.4                   | 0.0                  | 0.0             |
| IGFBP-3 | 470.8       | 1412.4 - 200000      | 200,000       | 302.2                  | 0.0                   | 100.0       | 0.0                    | 0.0                  | 0.0             |
| IGFBP-4 | 204.4       | 613.2 - 200000       | 200,000       | 656.3                  | 0.0                   | 92.3        | 0.0                    | 7.7                  | 0.0             |
| IGFBP-6 | 83.4        | 250.1 - 100000       | 100,000       | 203.5                  | 0.0                   | 84.6        | 15.4                   | 0.0                  | 0.0             |
| IGF-1   | 129.5       | 388.5 - 20000        | 20,000        | 131.4                  | 0.0                   | 92.3        | 7.7                    | 0.0                  | 0.0             |
| Insulin | 65.7        | 197.2 - 20000        | 20,000        | 75.6                   | 0.0                   | 76.9        | 23.1                   | 0.0                  | 0.0             |
| MCSF R  | 43.4        | 130.1 - 40000        | 40,000        | 672.0                  | 308.1                 | 0.0         | 0.0                    | 100.0                | 0.0             |
| NGF R   | 25.6        | 76.8 - 10000         | 10,000        | 17.3                   | 0.0                   | 100.0       | 0.0                    | 0.0                  | 0.0             |
| NT-3    | 30.3        | 90.9 - 40000         | 40,000        | 29.9                   | 0.0                   | 100.0       | 0.0                    | 0.0                  | 0.0             |
| NT-4    | 13.0        | 39 - 10000           | 10,000        | 23.8                   | 0.0                   | 69.2        | 30.8                   | 0.0                  | 0.0             |
| OPG     | 1.9         | 5.8 - 4000           | 4,000         | 2.9                    | 0.1                   | 69.2        | 30.8                   | 0.0                  | 0.0             |
| PDGF-AA | 4.0         | 11.9 - 3333          | 10,000        | 4.3                    | 0.0                   | 76.9        | 23.1                   | 0.0                  | 0.0             |
| PIGF    | 1.9         | 5.7 - 4000           | 4,000         | 4.1                    | 0.0                   | 61.5        | 38.5                   | 0.0                  | 0.0             |
| SCF     | 2.9         | 8.6 - 10000          | 10,000        | 6.4                    | 0.0                   | 69.2        | 30.8                   | 0.0                  | 0.0             |
| SCF R   | 16.8        | 50.4 - 20000         | 20,000        | 376.6                  | 161.8                 | 0.0         | 0.0                    | 100.0                | 0.0             |
| TGFa    | 2.6         | 7.7 - 10000          | 10,000        | 0.0                    | 0.0                   | 100.0       | 0.0                    | 0.0                  | 0.0             |
| TGFb1   | 414.3       | 1243 - 100000        | 100,000       | 472.8                  | 0.0                   | 92.3        | 7.7                    | 0.0                  | 0.0             |
| TGFb3   | 24.8        | 74.3 - 4444          | 13,333        | 0.4                    | 0.0                   | 100.0       | 0.0                    | 0.0                  | 0.0             |
| VEGF    | 22.9        | 68.6 - 10000         | 10,000        | 14.4                   | 0.0                   | 100.0       | 0.0                    | 0.0                  | 0.0             |
| VEGF R2 | 7.2         | 21.6 - 10000         | 10,000        | 58.4                   | 5.1                   | 38.5        | 15.4                   | 46.2                 | 0.0             |
| VEGF R3 | 29.9        | 89.8 - 40000         | 40,000        | 40.3                   | 0.6                   | 92.3        | 7.7                    | 0.0                  | 0.0             |
| VEGF-D  | 49.7        | 149.1 - 20000        | 20,000        | 4.7                    | 0.0                   | 100.0       | 0.0                    | 0.0                  | 0.0             |

## Group 10

| Target    | LOD (pg/ml) | Best Confident Range | Maximum Value | Highest Reported Value | Lowest Reported Value | % Below LOD | % Above LOD but <3xLOD | % in Best Confidence | % Above Maximum |
|-----------|-------------|----------------------|---------------|------------------------|-----------------------|-------------|------------------------|----------------------|-----------------|
| BLC       | 1.1         | 3.2 - 222            | 667           | 0.1                    | 0.0                   | 100.0       | 0.0                    | 0.0                  | 0.0             |
| Eotaxin   | 2.0         | 6.1 - 444            | 1,333         | 0.6                    | 0.0                   | 100.0       | 0.0                    | 0.0                  | 0.0             |
| Eotaxin-2 | 2.9         | 8.7 - 1000           | 1,000         | 0.0                    | 0.0                   | 100.0       | 0.0                    | 0.0                  | 0.0             |
| G-CSF     | 12.6        | 37.8 - 6666          | 20,000        | 1.0                    | 0.0                   | 100.0       | 0.0                    | 0.0                  | 0.0             |
| GM-CSF    | 6.5         | 19.4 - 1000          | 1,000         | 1.5                    | 0.0                   | 100.0       | 0.0                    | 0.0                  | 0.0             |
| I-309     | 3.8         | 11.4 - 4000          | 4,000         | 2.7                    | 0.0                   | 100.0       | 0.0                    | 0.0                  | 0.0             |
| ICAM-1    | 42.7        | 128.2 - 33333        | 100,000       | 430.5                  | 54.4                  | 0.0         | 23.1                   | 76.9                 | 0.0             |
| IFNg      | 4.6         | 13.8 - 666           | 2,000         | 0.7                    | 0.0                   | 100.0       | 0.0                    | 0.0                  | 0.0             |
| IL-1a     | 5.4         | 16.3 - 2000          | 2,000         | 8.3                    | 0.6                   | 69.2        | 30.8                   | 0.0                  | 0.0             |
| IL-1b     | 0.6         | 1.7 - 1000           | 1,000         | 4.6                    | 0.0                   | 84.6        | 7.7                    | 7.7                  | 0.0             |
| IL-1ra    | 9.1         | 27.3 - 2000          | 2,000         | 20.2                   | 5.8                   | 30.8        | 69.2                   | 0.0                  | 0.0             |
| IL-2      | 6.1         | 18.2 - 2000          | 2,000         | 1.4                    | 0.0                   | 100.0       | 0.0                    | 0.0                  | 0.0             |
| IL-4      | 3.5         | 10.5 - 2000          | 2,000         | 2.0                    | 0.0                   | 100.0       | 0.0                    | 0.0                  | 0.0             |
| IL-5      | 17.5        | 52.4 - 4000          | 4,000         | 7.7                    | 0.0                   | 100.0       | 0.0                    | 0.0                  | 0.0             |
| IL-6      | 18.5        | 55.5 - 2000          | 2,000         | 19.1                   | 0.0                   | 92.3        | 7.7                    | 0.0                  | 0.0             |
| IL-6R     | 3.8         | 11.5 - 10000         | 10,000        | 103.8                  | 3.8                   | 7.7         | 23.1                   | 69.2                 | 0.0             |
| IL-7      | 9.6         | 28.7 - 4000          | 4,000         | 3.6                    | 0.0                   | 100.0       | 0.0                    | 0.0                  | 0.0             |
| IL-8      | 2.2         | 6.6 - 500            | 500           | 5.9                    | 0.0                   | 61.5        | 38.5                   | 0.0                  | 0.0             |
| IL-10     | 3.1         | 9.3 - 4000           | 4,000         | 0.7                    | 0.0                   | 100.0       | 0.0                    | 0.0                  | 0.0             |
| IL-11     | 10.0        | 30.1 - 2222          | 6,667         | 10.5                   | 0.0                   | 92.3        | 7.7                    | 0.0                  | 0.0             |
| IL-12p40  | 6.7         | 20 - 3333            | 10,000        | 1.8                    | 0.0                   | 100.0       | 0.0                    | 0.0                  | 0.0             |
| IL-12p70  | 1.1         | 3.3 - 500            | 500           | 1.1                    | 0.0                   | 92.3        | 7.7                    | 0.0                  | 0.0             |
| IL-13     | 2.5         | 7.4 - 1000           | 1,000         | 10.0                   | 2.7                   | 0.0         | 84.6                   | 15.4                 | 0.0             |
| IL-15     | 8.1         | 24.4 - 4000          | 4,000         | 5.7                    | 2.0                   | 100.0       | 0.0                    | 0.0                  | 0.0             |
| IL-16     | 13.0        | 39 - 1666            | 5,000         | 1.4                    | 0.0                   | 100.0       | 0.0                    | 0.0                  | 0.0             |
| IL-17     | 7.7         | 23 - 4000            | 4,000         | 3.8                    | 0.0                   | 100.0       | 0.0                    | 0.0                  | 0.0             |
| MCP-1     | 4.5         | 13.6 - 666           | 2,000         | 2.5                    | 0.0                   | 100.0       | 0.0                    | 0.0                  | 0.0             |
| MCSF      | 2.7         | 8.2 - 1333           | 4,000         | 3.4                    | 0.0                   | 92.3        | 7.7                    | 0.0                  | 0.0             |
| MIG       | 83.3        | 249.8 - 5000         | 5,000         | 189.0                  | 32.3                  | 69.2        | 30.8                   | 0.0                  | 0.0             |
| MIP-1a    | 11.4        | 34.1 - 1111          | 3,333         | 25.4                   | 0.0                   | 69.2        | 30.8                   | 0.0                  | 0.0             |
| MIP-1b    | 2.2         | 6.7 - 333            | 1,000         | 3.9                    | 0.3                   | 38.5        | 61.5                   | 0.0                  | 0.0             |
| MIP-1d    | 6.2         | 18.6 - 3333          | 10,000        | 1.1                    | 0.0                   | 100.0       | 0.0                    | 0.0                  | 0.0             |
| PDGF-BB   | 2.0         | 5.9 - 2000           | 2,000         | 2.6                    | 0.0                   | 76.9        | 23.1                   | 0.0                  | 0.0             |
| RANTES    | 10.8        | 32.4 - 2222          | 6,667         | 44.9                   | 0.0                   | 69.2        | 23.1                   | 7.7                  | 0.0             |
| TIMP-1    | 21.2        | 63.6 - 4444          | 13,333        | 367.6                  | 68.3                  | 0.0         | 0.0                    | 100.0                | 0.0             |
| TIMP-2    | 20.8        | 62.5 - 40000         | 40,000        | 4,694.7                | 0.0                   | 30.8        | 0.0                    | 69.2                 | 0.0             |
| TNFa      | 25.3        | 76 - 2000            | 2,000         | 72.5                   | 3.8                   | 46.2        | 53.8                   | 0.0                  | 0.0             |
| TNFb      | 49.8        | 149.3 - 20000        | 20,000        | 22.0                   | 0.0                   | 100.0       | 0.0                    | 0.0                  | 0.0             |
| TNF RI    | 29.4        | 88.3 - 40000         | 40,000        | 414.0                  | 18.8                  | 23.1        | 23.1                   | 53.8                 | 0.0             |
| TNF RII   | 43.4        | 130.1 - 40000        | 40,000        | 231.9                  | 0.0                   | 61.5        | 0.0                    | 38.5                 | 0.0             |

## Group 11

| Target      | LOD (pg/ml) | Best Confident Range | Maximum Value | Highest Reported Value | Lowest Reported Value | % Below LOD | % Above LOD but <3xLOD | % in Best Confidence | % Above Maximum |
|-------------|-------------|----------------------|---------------|------------------------|-----------------------|-------------|------------------------|----------------------|-----------------|
| 4-1BB       | 12.6        | 37.7 - 10000         | 10,000        | 7.6                    | 0.0                   | 100.0       | 0.0                    | 0.0                  | 0.0             |
| ALCAM       | 9.2         | 27.5 - 10000         | 10,000        | 5.3                    | 0.0                   | 100.0       | 0.0                    | 0.0                  | 0.0             |
| B7-1        | 10.9        | 32.8 - 10000         | 10,000        | 10.1                   | 0.0                   | 100.0       | 0.0                    | 0.0                  | 0.0             |
| BCMA        | 17.2        | 51.5 - 20000         | 20,000        | 181.5                  | 95.4                  | 0.0         | 0.0                    | 100.0                | 0.0             |
| CD14        | 30.9        | 92.7 - 10000         | 10,000        | 34.8                   | 0.0                   | 84.6        | 15.4                   | 0.0                  | 0.0             |
| CD30        | 27.9        | 83.7 - 10000         | 10,000        | 19.2                   | 0.0                   | 100.0       | 0.0                    | 0.0                  | 0.0             |
| CD40L       | 9.7         | 29 - 10000           | 10,000        | 1.3                    | 0.0                   | 100.0       | 0.0                    | 0.0                  | 0.0             |
| CEACAM-1    | 46.0        | 138 - 10000          | 10,000        | 36.4                   | 0.0                   | 100.0       | 0.0                    | 0.0                  | 0.0             |
| DR6         | 79.2        | 237.6 - 4000         | 4,000         | 313.5                  | 0.0                   | 69.2        | 23.1                   | 7.7                  | 0.0             |
| Dtk         | 26.3        | 78.9 - 20000         | 20,000        | 66.7                   | 0.0                   | 76.9        | 23.1                   | 0.0                  | 0.0             |
| Endoglin    | 17.4        | 52.1 - 4000          | 4,000         | 59.0                   | 0.0                   | 38.5        | 38.5                   | 23.1                 | 0.0             |
| ErbB3       | 47.4        | 142.3 - 20000        | 20,000        | 110.3                  | 0.0                   | 84.6        | 15.4                   | 0.0                  | 0.0             |
| E-Selectin  | 221.0       | 662.9 - 40000        | 40,000        | 1,286.1                | 61.8                  | 7.7         | 30.8                   | 61.5                 | 0.0             |
| Fas         | 4.7         | 14 - 2000            | 2,000         | 1.5                    | 0.0                   | 100.0       | 0.0                    | 0.0                  | 0.0             |
| Flt-3L      | 1.9         | 5.7 - 2000           | 2,000         | 2.3                    | 0.0                   | 84.6        | 15.4                   | 0.0                  | 0.0             |
| GITR        | 34.9        | 104.8 - 10000        | 10,000        | 17.9                   | 0.0                   | 100.0       | 0.0                    | 0.0                  | 0.0             |
| HVEM        | 39.8        | 119.3 - 40000        | 40,000        | 11.7                   | 0.0                   | 100.0       | 0.0                    | 0.0                  | 0.0             |
| ICAM-3      | 67.2        | 201.5 - 33333        | 100,000       | 59.6                   | 0.0                   | 100.0       | 0.0                    | 0.0                  | 0.0             |
| IL-1 R4     | 10.8        | 32.3 - 4000          | 4,000         | 3.1                    | 0.0                   | 100.0       | 0.0                    | 0.0                  | 0.0             |
| IL-1 RI     | 23.2        | 69.5 - 4000          | 4,000         | 21.6                   | 0.0                   | 100.0       | 0.0                    | 0.0                  | 0.0             |
| IL-2 Rg     | 81.5        | 244.6 - 10000        | 10,000        | 420.0                  | 0.0                   | 76.9        | 7.7                    | 15.4                 | 0.0             |
| IL-10 Rb    | 13.0        | 39 - 4000            | 4,000         | 36.0                   | 0.0                   | 69.2        | 30.8                   | 0.0                  | 0.0             |
| IL-17R      | 30.9        | 92.7 - 10000         | 10,000        | 11.6                   | 0.0                   | 100.0       | 0.0                    | 0.0                  | 0.0             |
| IL-21R      | 25.5        | 76.4 - 20000         | 20,000        | 168.1                  | 8.4                   | 15.4        | 69.2                   | 15.4                 | 0.0             |
| LIMPII      | 16.2        | 48.5 - 4000          | 4,000         | 5.9                    | 0.0                   | 100.0       | 0.0                    | 0.0                  | 0.0             |
| Lipocalin-2 | 2.0         | 6.1 - 1000           | 1,000         | 2,198.4                | 33.0                  | 0.0         | 0.0                    | 38.5                 | 61.5            |
| L-Selectin  | 448.3       | 1344.8 - 100000      | 100,000       | 1,337.3                | 0.0                   | 38.5        | 61.5                   | 0.0                  | 0.0             |
| LYVE-1      | 1.4         | 4.2 - 2000           | 2,000         | 202.0                  | 117.8                 | 0.0         | 0.0                    | 100.0                | 0.0             |
| MICA        | 13.6        | 40.7 - 10000         | 10,000        | 13.8                   | 0.0                   | 92.3        | 7.7                    | 0.0                  | 0.0             |
| MICB        | 18.6        | 55.8 - 15000         | 15,000        | 142.5                  | 1.3                   | 7.7         | 7.7                    | 84.6                 | 0.0             |
| NRG1-b1     | 21.3        | 64 - 15000           | 15,000        | 70.4                   | 0.0                   | 69.2        | 23.1                   | 7.7                  | 0.0             |
| PDGF Rb     | 582.8       | 1748.3 - 100000      | 100,000       | 1,598.1                | 0.0                   | 84.6        | 15.4                   | 0.0                  | 0.0             |
| PECAM-1     | 66.4        | 199.1 - 20000        | 20,000        | 62.4                   | 0.0                   | 100.0       | 0.0                    | 0.0                  | 0.0             |
| RAGE        | 9.6         | 28.8 - 10000         | 10,000        | 8.8                    | 0.0                   | 100.0       | 0.0                    | 0.0                  | 0.0             |
| TIM-1       | 30.4        | 91.2 - 10000         | 10,000        | 18.8                   | 0.0                   | 100.0       | 0.0                    | 0.0                  | 0.0             |
| TRAIL R3    | 9.5         | 28.6 - 5000          | 5,000         | 58.7                   | 0.0                   | 53.8        | 38.5                   | 7.7                  | 0.0             |
| Trappin-2   | 15.4        | 46.3 - 3333          | 10,000        | 1,094.2                | 0.0                   | 7.7         | 15.4                   | 76.9                 | 0.0             |
| uPAR        | 49.4        | 148.1 - 40000        | 40,000        | 941.4                  | 0.0                   | 15.4        | 38.5                   | 46.2                 | 0.0             |
| VCAM-1      | 364.5       | 1093.5 - 200000      | 200,000       | 631.6                  | 0.0                   | 38.5        | 61.5                   | 0.0                  | 0.0             |
| XEDAR       | 25.9        | 77.7 - 10000         | 10,000        | 12.0                   | 0.0                   | 100.0       | 0.0                    | 0.0                  | 0.0             |

**Supplementary Table 4.** Cytokines produced at statistically significant different levels during neutrophil swarming compared to non-swarming (NS) and non-activated (NA) controls.

| Cytokine           | Significance                                       | Comparison Turkey-Kramer |       |            |         |
|--------------------|----------------------------------------------------|--------------------------|-------|------------|---------|
|                    |                                                    | Group                    | Level | Comparison | p Value |
| <b>Adiponectin</b> | F (2,9) = 14.4962<br>p= 0.005<br>Kruskal-Wallis    | Swarm                    | A     | Swarm - NA | 0.0041  |
|                    |                                                    | NS                       | AB    | Swarm - NS | 0.0568  |
|                    |                                                    | NA                       | B     | NS - NA    | 0.1146  |
| <b>Adipsin</b>     | F (2,9) = 7.5897<br>p= 0.0227<br>Transformed Data  | Swarm                    | A     | Swarm - NA | 0.0041  |
|                    |                                                    | NS                       | A     | Swarm - NS | 0.0406  |
|                    |                                                    | NA                       | B     | NS - NA    | 0.9651  |
| <b>ANG-2</b>       | F (2,9) = 11.1386<br>p= 0.0096<br>ANOVA            | Swarm                    | A     | Swarm - NA | 0.0403  |
|                    |                                                    | NS                       | A     | NS - NA    | 0.0089  |
|                    |                                                    | NA                       | B     | Swarm - NS | 0.424   |
| <b>Cathepsin-S</b> | F (2,9) = 32<br>p= 0.0006<br>Kruskal-Wallis        | Swarm                    | A     | Swarm - NA | 0.0005  |
|                    |                                                    | NS                       | B     | NS - NA    | 0.0167  |
|                    |                                                    | NA                       | AB    | Swarm - NS | 0.0167  |
| <b>CD200</b>       | F (2,9) = 6.9692<br>p= 0.0273<br>Kruskal-Wallis    | Swarm                    | A     | Swarm - NA | 0.0299  |
|                    |                                                    | NS                       | AB    | NS - NA    | 0.0627  |
|                    |                                                    | NA                       | B     | Swarm - NS | 0.8214  |
| <b>CHI3L1</b>      | F (2,9) = 11.3831<br>p= 0.0091<br>Transformed Data | Swarm                    | A     | Swarm - NA | 0.0152  |
|                    |                                                    | NS                       | A     | NS - NA    | 0.0138  |
|                    |                                                    | NA                       | B     | Swarm - NS | 0.9955  |
| <b>Clusterin</b>   | F (2,9) = 13.3458<br>p= 0.0062<br>Transformed Data | Swarm                    | A     | Swarm - NA | 0.0062  |
|                    |                                                    | NS                       | A     | NS - NA    | 0.0196  |
|                    |                                                    | NA                       | B     | Swarm - NS | 0.5788  |
| <b>CRP</b>         | F (2,9) = 5.416<br>p= 0.0444<br>ANOVA              | Swarm                    | A     | Swarm - NA | 0.0392  |
|                    |                                                    | NS                       | AB    | Swarm - NS | 0.1733  |
|                    |                                                    | NA                       | B     | NS - NA    | 0.5049  |
| <b>Galectin-3</b>  | F (2,9) = 17.6341<br>p= 0.0031<br>Kruskal-Wallis   | Swarm                    | A     | Swarm - NA | 0.0025  |
|                    |                                                    | NS                       | B     | Swarm - NS | 0.04    |
|                    |                                                    | NA                       | AB    | NS - NA    | 0.0814  |
| <b>CXCL3</b>       | F (2,9) = 7.3665<br>p= 0.0242<br>Kruskal-Wallis    | Swarm                    | A     | Swarm - NA | 0.0387  |
|                    |                                                    | NS                       | A     | NS - NA    | 0.0348  |
|                    |                                                    | NA                       | B     | Swarm - NS | 0.9957  |
| <b>IL-21R</b>      | F (2,9) = 5.5921<br>p= 0.0426<br>Kruskal-Wallis    | Swarm                    | A     | Swarm - NA | 0.0357  |
|                    |                                                    | NS                       | AB    | Swarm - NS | 0.2897  |
|                    |                                                    | NA                       | B     | NS - NA    | 0.2897  |
| <b>IL-24</b>       | F (2,9) = 12.2516                                  | Swarm                    | A     | Swarm - NA | 0.0062  |

|                    |                                                    |                   |              |                                     |                             |
|--------------------|----------------------------------------------------|-------------------|--------------|-------------------------------------|-----------------------------|
|                    | p= 0. 0076<br>Kruskal-Wallis                       | NS<br>NA          | AB<br>B      | NS - NA<br>Swarm - NS               | 0.1468<br>0.0766            |
| <b>IL-6R</b>       | F (2,9) = 17.1<br>p= 0.0033<br>Kruskal-Wallis      | Swarm<br>NS<br>NA | A<br>A<br>B  | Swarm - NA<br>NS - NA<br>Swarm - NS | 0.0028<br>0.0302<br>0.1278  |
| <b>LAP(TGFb1)</b>  | F (2,9) = 6.4047<br>p= 0.0325<br>ANOVA             | Swarm<br>NS<br>NA | A<br>AB<br>B | Swarm - NA<br>Swarm - NS<br>NS - NA | 0.0342<br>0.0783<br>0.7879  |
| <b>Lipocalin-2</b> | F (2,9) = 115.0711<br>p< 0.0001<br>ANOVA           | Swarm<br>NS<br>NA | A<br>A<br>B  | Swarm - NA<br>NS - NA<br>Swarm - NS | <0.0001<br><0.0001<br>0.957 |
| <b>LOX-1</b>       | F (2,9) = 12.9864<br>p= 0.0066<br>ANOVA            | Swarm<br>NS<br>NA | A<br>A<br>B  | Swarm - NA<br>NS - NA<br>Swarm - NS | 0.0068<br>0.0218<br>0.5518  |
| <b>MICB</b>        | F (2,9) = 6.1685<br>p= 0.0350<br>Kruskal-Wallis    | Swarm<br>NS<br>NA | A<br>AB<br>B | Swarm - NA<br>Swarm - NS<br>NS - NA | 0.0453<br>0.0598<br>0.9726  |
| <b>CCL3</b>        | F (2,9) = 6.7585<br>p= 0.0291<br>ANOVA             | Swarm<br>NS<br>NA | A<br>AB<br>B | Swarm - NA<br>Swarm - NS<br>NS - NA | 0.0247<br>0.582<br>0.3552   |
| <b>MMP-8</b>       | F (2,9) = 18<br>p= 0.0029<br>Kruskal-Wallis        | Swarm<br>NS<br>NA | A<br>A<br>B  | Swarm - NA<br>NS - NA<br>Swarm - NS | 0.0049<br>0.0049<br>1       |
| <b>MMP-9</b>       | F (2,9) = 24.6723<br>p= 0.0013<br>ANOVA            | Swarm<br>NS<br>NA | A<br>A<br>B  | Swarm - NA<br>NS - NA<br>Swarm - NS | 0.002<br>0.0024<br>1        |
| <b>CXCL7</b>       | F (2,9) = 30.0237<br>p= 0.0007<br>ANOVA            | Swarm<br>NS<br>NA | A<br>B<br>AB | Swarm - NA<br>NS - NA<br>Swarm - NS | 0.0006<br>0.0192<br>0.0193  |
| <b>Neprilysin</b>  | F (2,9) = 5.3345<br>p= 0.0466<br>Kruskal-Wallis    | Swarm<br>NS<br>NA | A<br>AB<br>B | Swarm - NA<br>NS - NA<br>Swarm - NS | 0.0427<br>0.5904<br>0.1546  |
| <b>Nidogen-1</b>   | F (2,9) = 27.7397<br>p= 0.0009<br>Kruskal-Wallis   | Swarm<br>NS<br>NA | A<br>B<br>AB | Swarm - NA<br>Swarm - NS<br>NS - NA | 0.0007<br>0.0299<br>0.0299  |
| <b>NOV</b>         | F (2,9) = 5.8505<br>p= 0. 0389<br>Transformed Data | Swarm<br>NS<br>NA | A<br>AB<br>B | Swarm - NA<br>NS - NA<br>Swarm - NS | 0.0329<br>0.2187<br>0.35    |
| <b>NT-3</b>        | F (2,9) = 5.6436<br>p= 0.0418<br>ANOVA             | Swarm<br>NS<br>NA | A<br>AB<br>B | Swarm - NA<br>NS - NA<br>Swarm - NS | 0.0329<br>0.0421<br>0.1063  |
| <b>PDGF-BB</b>     | F (2,9) = 10.0877<br>p= 0.0120                     | Swarm<br>NS       | A<br>B       | Swarm - NA<br>NS - NA               | 0.0114<br>0.4815            |



|                    |                                                                |                   |              |                                     |                              |
|--------------------|----------------------------------------------------------------|-------------------|--------------|-------------------------------------|------------------------------|
|                    | ANOVA                                                          | NA                | B            | Swarm - NS                          | 0.0464                       |
| <b>Pentraxin 3</b> | F (2,9) = 52,9715<br>p= 0.0002<br>Transformed Data             | Swarm<br>NS<br>NA | A<br>B<br>AB | Swarm - NA<br>NS - NA<br>Swarm - NS | 0.001<br>0.0015<br>0.0247    |
| <b>CXCL4</b>       | F (2,9) = 22.0507<br>p= 0.0017<br>Transformed Data<br>Analysis | Swarm<br>NS<br>NA | A<br>A<br>B  | Swarm - NA<br>NS - NA<br>Swarm - NS | 0.0017<br>0.0077<br>0.2894   |
| <b>PGRP-S</b>      | F (2,9) = 97.6231<br>p< 0.0001<br>Transformed Data             | Swarm<br>NS<br>NA | A<br>A<br>B  | Swarm - NA<br>NS - NA<br>Swarm - NS | <0.0001<br><0.0001<br>0.9447 |
| <b>RANK</b>        | F (2,9) = 5.5714<br>p= 0.0429<br>Kruskal-Wallis                | Swarm<br>NS<br>NA | A<br>AB<br>B | Swarm - NA<br>NS - NA<br>Swarm - NS | 0.031<br>0.2543<br>0.3326    |
| <b>CCL5</b>        | F (2,9) = 29.7448<br>p= 0.0008<br>Transformed Data             | Swarm<br>NS<br>NA | A<br>A<br>B  | Swarm - NA<br>NS - NA<br>Swarm - NS | 0.0006<br>0.0071<br>0.0676   |
| <b>Siglec-5</b>    | F (2,9) = 8.4716<br>p= 0.0179<br>Kruskal-Wallis                | Swarm<br>NS<br>NA | A<br>AB<br>B | Swarm - NA<br>NS - NA<br>Swarm - NS | 0.0152<br>0.1083<br>0.3028   |
| <b>TIMP-1</b>      | F (2,9) = 20.2521<br>p= 0.0021<br>ANOVA                        | Swarm<br>NS<br>NA | A<br>B<br>AB | Swarm - NA<br>Swarm - NS<br>NS - NA | 0.0017<br>0.0429<br>0.0441   |
| <b>TIMP-2</b>      | F (2,9) = 23.6422<br>p= 0.0014<br>Transformed Data             | Swarm<br>NS<br>NA | A<br>A<br>B  | Swarm - NA<br>NS - NA<br>Swarm - NS | <0.0022<br><0.0027<br>0.9447 |
| <b>TLR2</b>        | F (2,9) = 5.9131<br>p= 0.0381<br>ANOVA                         | Swarm<br>NS<br>NA | A<br>A<br>B  | Swarm - NA<br>NS - NA<br>Swarm - NS | 0.017<br>0.0435<br>0.4969    |
| <b>TLR4</b>        | F (2,9) = 6.6585<br>p= 0.0300<br>ANOVA                         | Swarm<br>NS<br>NA | A<br>AB<br>B | Swarm - NA<br>NS - NA<br>Swarm - NS | 0.0254<br>0.3431<br>0.1691   |
| <b>TRAIL R3</b>    | F (2,9) = 5.6919<br>p= 0.0411<br>Kruskal-Wallis                | Swarm<br>NS<br>NA | A<br>AB<br>B | NS - NA<br>Swarm - NA<br>Swarm - NS | 0.1253<br>0.0388<br>0.6397   |
| <b>Trappin-2</b>   | F (2,9) = 9.2969<br>p= 0.0145<br>Transformed Data              | Swarm<br>NS<br>NA | A<br>AB<br>B | Swarm - NA<br>NS - NA<br>Swarm - NS | 0.0121<br>0.1125<br>0.2252   |
| <b>TSP-1</b>       | F (2,9) = 33.0743<br>p= 0.0006<br>ANOVA                        | Swarm<br>NS<br>NA | A<br>B<br>AB | Swarm - NA<br>NS - NA<br>Swarm - NS | 0.0005<br>0.0327<br>0.0081   |

**Supplementary Table 5.** Demographic information for the patients used for the measurements reported in Figure 6.

| Patient ID | Sex | Age | Type               | Infection                                                      | Treatment                                                                                             |
|------------|-----|-----|--------------------|----------------------------------------------------------------|-------------------------------------------------------------------------------------------------------|
| Pt13       | M   | 57  | Trauma             | -                                                              | -                                                                                                     |
| Pt14       | M   | 76  | Trauma             | -                                                              | Levophed                                                                                              |
| Pt15       | M   | 50  | Trauma             | Suspected                                                      | Trimethoprim/Sulfamethoxazole, Ivermectin; Meropenem, Micafungin, Valaciclovir, Daptomycin, Midodrine |
| Pt16       | M   | 65  | Trauma             | -                                                              | Vanco, Cefepime                                                                                       |
| Pt17       | F   | 66  | Trauma             | -                                                              | Vanco, Cefepime, Levophed                                                                             |
| Pt18       | M   | 64  | Trauma             | -                                                              | Vanco, Amphotericin, Levophed                                                                         |
| Pt19       | M   | 87  | Trauma             | Clostridium difficile colitis                                  | Vanco, Piperacillin, Tazobactam, Midodrine                                                            |
| Pt21       | F   | 49  | Trauma             | -                                                              | Clindamycin, Levophed                                                                                 |
| M13        | F   | 54  | Autoimmune disease | SOFA: 2; Exanthematous Pustulosis (mimicked candida infection) |                                                                                                       |
| T30        | F   | 66  | Septic             | SOFA:5; VRE; MRSA; MRDO infection                              | Norepinephrine, Phenylephrine                                                                         |

SOFA: Sequential organ failure assessment; VRE: Vancomycin-resistance enterococci; MRDO: Multi-drug resistant organism; Antibiotics: Trimethoprim, sulfamethoxazole, ivermectin, vanco, cefepime, meropenem, micafungin, valaciclovir, daptomycin, ampicillin, piperacillin, tazobactam, clindamycin; Vasoactive drugs: Levophed, midodrine, norepinephrine, phenylephrine.

## **Supplementary Video Captions.**

**Supplementary Video 1. Human neutrophil swarming on arrays of clusters of zymosan particles.** Immediately after neutrophils (blue - only the nucleus of the neutrophils is stained) are added to the device, they migrate randomly on the glass surface. After one neutrophil encounters a cluster of zymosan particles (red), an increasing number of neutrophils converge and accumulate around the particle-cluster. At one hour, an array of 5 x 4 swarms is clearly visible. Initial neutrophil concentration is  $7.5 \times 10^5$  cells/mL.

**Supplementary Video 2. Human neutrophil swarming on a single cluster of zymosan particles.** Detailed imaging of neutrophils (blue - only the nucleus of the neutrophils is stained) swarming around a single zymosan-particles cluster (red) reveals the three stages of swarming: *scouting* in the first ~10 minutes after cell loading, *amplification* that is the fastest at ~25 minutes, and *stabilization* that occurs after 40 minutes. Isolated human neutrophils are loaded on the device at  $7.5 \times 10^5$  cells/mL.

**Supplementary Video 3. Human neutrophils do not swarm on solitary zymosan particles.** After neutrophils encounter and phagocytose a single zymosan particle, no recruitment of additional neutrophils takes place. The nucleus of the neutrophils is stained in blue. The location of the zymosan particle is indicated by the red arrow. Isolated human neutrophils are loaded on the device at  $7.5 \times 10^5$  cells/mL.

**Supplementary Video 4. Human neutrophil tracking during swarming.** The trajectories of human neutrophils migrating towards a zymosan particle cluster (green)

are recorded over time (white tracks). Neutrophils that are tracked for the entire duration of the movie are marked in red. Neutrophils that are migrating towards the zymosan particle cluster (chemotactic migration) are marked with an additional green circle. Scale bar is 100  $\mu\text{m}$ .

**Supplementary Video 5. Human neutrophil tracking during swarming in the presence of LTB<sub>4</sub> receptors antagonists.** Neutrophils were exposed to U75302 and LY255283, BLT1 and BLT2 receptors antagonists. The inhibitors were present during the experiment. The trajectories of human neutrophils migrating towards a zymosan particle cluster (green) are recorded over time (white tracks). Neutrophils that are tracked for the entire duration of the movie are marked in red. Neutrophils that are migrating towards the zymosan particle cluster (chemotactic migration) are marked with an additional green circle. Scale bar is 100  $\mu\text{m}$ .
